# Supplementary material
Source: PubMed Central journal article supplement (PMC3319070)
Supplement: NIHMS355243-supplement-supplement_1.pdf [file NIHMS355243-supplement-supplement_1.pdf]

## Supplementary Discussion

### **Distinct properties of $[PSI^+]$ prion states**

The Sup35 prion states in wild strains had different biochemical and genetic behaviors. The extent of aggregation of Sup35 appeared to differ between strains: Sup35 amyloids were easily detected in strains UCD#978, #5672, and NCYC#3467, but the signal was weaker for strains UCD#587, UCD#824, and UCD#2534. Because our SDD-AGE data were not quantitative, we did not characterize this further. Strains UCD#779, UCD#885, and UCD#939 occasionally produced colonies that lacked Sup35 amyloids. These colonies also lacked Rnq1 amyloids. We speculate that the simultaneous loss of both prions reflects a high degree of co-aggregation between these two proteins in these strains.

The over-expression of WT Hsp104 potentially eliminates  $[PSI^+]$  in laboratory strains. We also observed that transient over-expression of Hsp104 eliminated  $[PSI^+]$  from strains UCD#978 and NCYC#3467. In contrast, strains #5672 and UCD#824 remained  $[PSI^+]$  after this treatment (Supplementary Fig. 1). Thus, the susceptibility of  $[PSI^+]$  to elevated levels of Hsp104 is not shared by all natural  $[PSI^+]$  states.

Not all curable phenotypes in  $[PSI^+]$  strains could be attributed to a loss of function of Sup35 in its prion state. Two curable phenotypes were not recapitulated by expression of Sup35 $\Delta$ PrD in  $[PSI^+]$  strains: resistance of UCD#2534 (a commercial dry wine strain) to acidic growth conditions and sensitivity of UCD#621 (a natural fermentation isolate) to 4-NQO. These traits could be due either to a gain of function of Sup35 in its prion conformation, or to other Hsp104-dependent prions.

### **Environmental contingency of prion-dependent traits**

Under a wide range of stressful growth conditions, cells increase the rate at which they switch into and out of the  $[PSI^+]$  state<sup>1</sup>. Other prions are also influenced by environmental changes including refrigeration and nutrient limitation<sup>2</sup>. This link between heritable phenotypic diversity and environmental contingency is a natural consequence of stress-induced disruptions in protein homeostasis. Conformational changes in Sup35's PrD are strongly influenced by temperature<sup>3</sup> and by a host of protein homeostasis mechanisms that regulate prion nucleation and inheritance. In addition to Hsp104, factors as diverse as osmolytes<sup>4</sup>, molecular chaperones<sup>5,6</sup>, and the protein degradation machinery<sup>2,7</sup>, all influence the link between prions and environmental stress. In any case, the gain and loss of prions appears to constitute a sophisticated bet-hedging mechanism that allows cells to more frequently explore heritable new phenotypes when they are not well suited to their environments.

### **Evidence for an adaptive cycle for $[PSI^+]$**

Defects in translation are certain to be deleterious in the long run, and the original bet-hedging hypothesis therefore posited that  $[PSI^+]$  would be transient in the wild<sup>8</sup>. That we observed  $[PSI^+]$ -dependent adhesion to be readily fixed in UCD#978 makes the retention of this prion in 1% of wild strains seem even more surprising.  $[PSI^+]$ -dependent traits would be more difficult to assimilate in strains with defects in sexual reproduction. These strains might, therefore, harbour  $[PSI^+]$  longer than their sexually

reproducing counterparts. A recent wide survey of wine strains determined that 95% are fertile diploids<sup>9</sup>. Yet three of the six randomly selected wild [*PSI*<sup>+</sup>] strains that we examined either did not sporulate or had very low spore viability, even with three different sporulation protocols – a greater fraction than expected by chance. Indeed, two of the three strains had genome sizes consistent with low fertility – #5672 was triploid and UCD#978 was approximately tetraploid. This suggests a natural adaptive cycle for [*PSI*<sup>+</sup>], in which the prion appears spontaneously, is maintained by selection for the beneficial phenotypes it confers, and finally is lost after those phenotypes have been fixed.

- 1 Tyedmers, J., Madariaga, M. L. & Lindquist, S. Prion switching in response to environmental stress. *PLoS Biol* **6**, e294 (2008).
- 2 Chernoff, Y. O. Stress and prions: lessons from the yeast model. *FEBS Lett* **581**, 3695-3701 (2007).
- 3 Tanaka, M., Chien, P., Naber, N., Cooke, R. & Weissman, J. S. Conformational variations in an infectious protein determine prion strain differences. *Nature* **428**, 323-328 (2004).
- 4 Tatzelt, J., Prusiner, S. B. & Welch, W. J. Chemical chaperones interfere with the formation of scrapie prion protein. *The EMBO journal* **15**, 6363-6373 (1996).
- 5 Song, Y. *et al.* Role for Hsp70 chaperone in *Saccharomyces cerevisiae* prion seed replication. *Eukaryotic cell* **4**, 289-297 (2005).
- 6 Newnam, G. P., Wegrzyn, R. D., Lindquist, S. L. & Chernoff, Y. O. Antagonistic interactions between yeast chaperones Hsp104 and Hsp70 in prion curing. *Molecular and cellular biology* **19**, 1325-1333 (1999).
- 7 Chernova, T. A. *et al.* Prion induction by the short-lived, stress-induced protein Irb2 is regulated by ubiquitination and association with the actin cytoskeleton. *Mol Cell* **43**, 242-252 (2011).
- 8 True, H. L. & Lindquist, S. L. A yeast prion provides a mechanism for genetic variation and phenotypic diversity. *Nature* **407**, 477-483 (2000).
- 9 Cubillos, F. A., Vasquez, C., Faugeron, S., Ganga, A. & Martinez, C. Self-fertilization is the main sexual reproduction mechanism in native wine yeast populations. *FEMS Microbiol Ecol* **67**, 162-170 (2009).



## **Supplementary Figures and Legends**

**Supplementary Figure 1.** Hsp104-dependence of natural Sup35 and Rnq1 amyloids. (A) SDD-AGEs probed for Sup35 or Rnq1 for the indicated strains before and after treatment with GdHCl. (B) The indicated strains were probed for Sup35 and Rnq1 after they had transiently carried a plasmid constitutively over-expressing either GFP or Hsp104<sup>DN</sup>. (C) The indicated strains were probed for Sup35 and Rnq1 after they had transiently carried a plasmid constitutively over-expressing either GFP (-) or WT Hsp104. (+). Strain YJW508 is a [*PSI*<sup>+</sup>] lab strain (1). (D) Immunoblot of the indicated strains over-expressing Hsp104 and Hsp104<sup>DN</sup>, probed with anti-Hsp104.

### **Supplementary Figure 2.**

Wild strains (in blue) are as evolutionarily distant from each other as they are from lab strains (in black) or other wild strains whether they are other wine strains (green) or even clinical isolates (purple). Neighbor-joining tree was constructed using the genetic distance estimated from the number of pairwise distinct SNPs.

### **Supplementary Figure 3.**

Growth of wild [*PSI*<sup>+</sup>] strain #5672 and its cured derivative in minimal grape must medium (MMM) (2). This contrasts with very little difference in growth rate in rich medium (Table S4). Four independent isolates of each strain were inoculated in 96-well plates containing 150  $\mu$ L MMM at an initial OD<sub>600</sub> of 0.1. Plates were incubated at 30C, with shaking every 15 min prior to OD readings in a plate reader (Thermo multiskan). Error bars represent the standard deviation of the four measurements at each timepoint.

### **Supplementary Figure 4.**

Experimental schematic for high throughput phenotyping of cured wild strains. Hundreds of wild yeast strains were cured of Hsp104-dependent prions they might harbor by passage on GdHCl. The original wild isolates and their cured derivatives were exposed in quadruplicate to diverse stressful conditions in 384-well plates. Their growth was measured every 20 hours by OD<sub>600</sub> in a microplate reader following gentle agitation to re-suspend settled cells. In some strains and conditions the original isolates and cured strains grew comparably. In others the original isolate or the cured strain grew better.

Figure S1

**A**

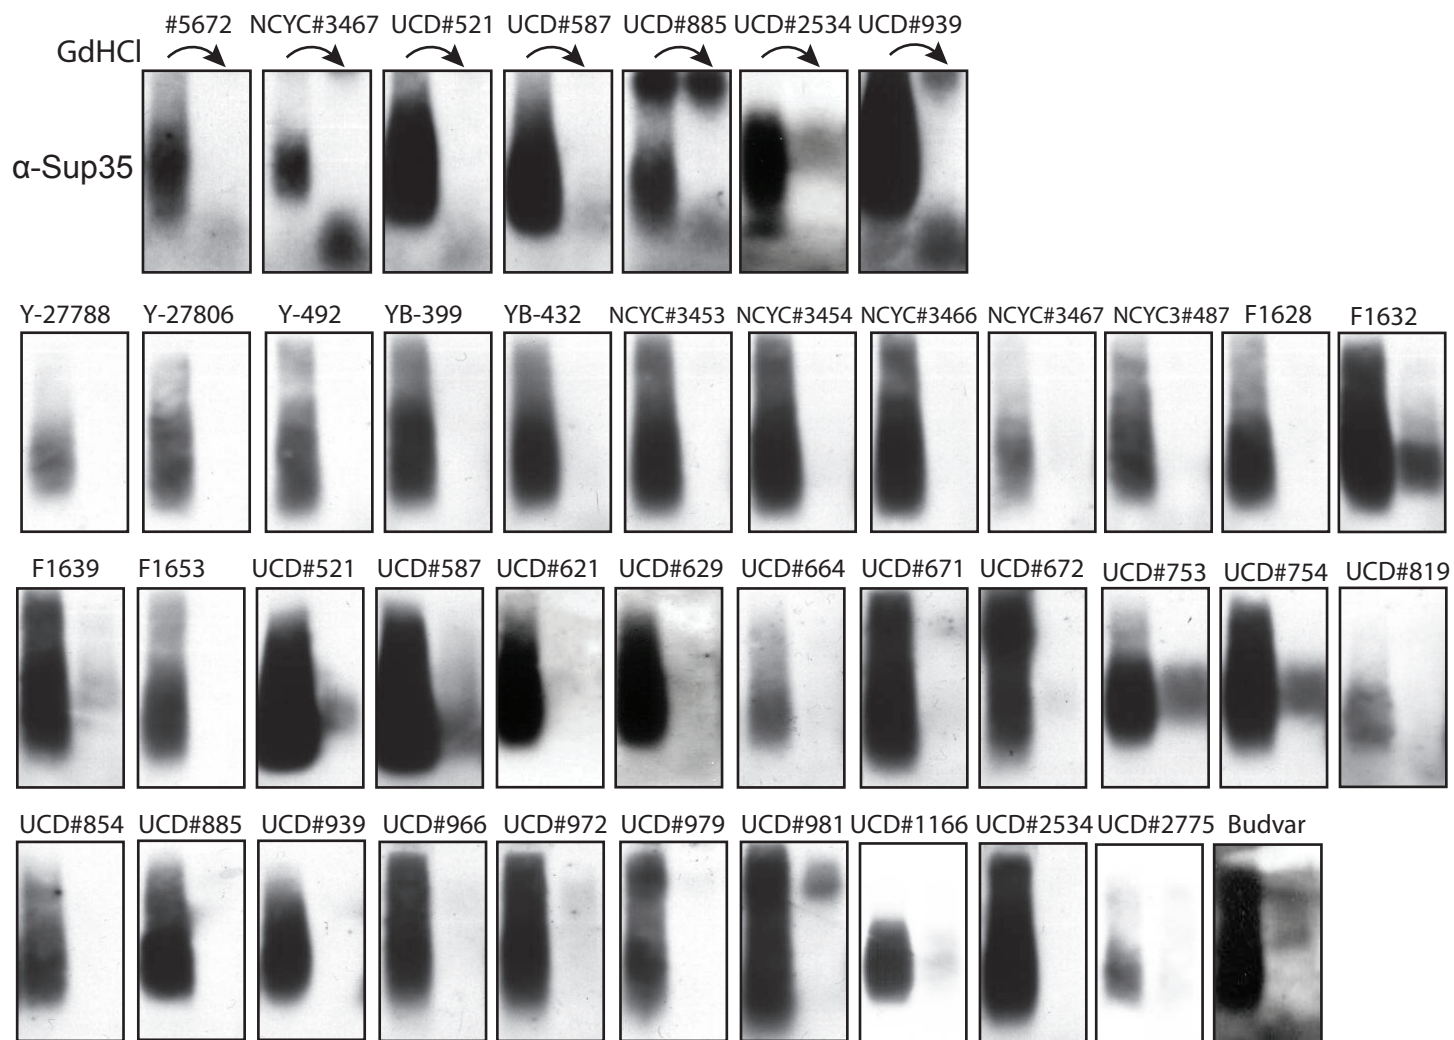

**B**

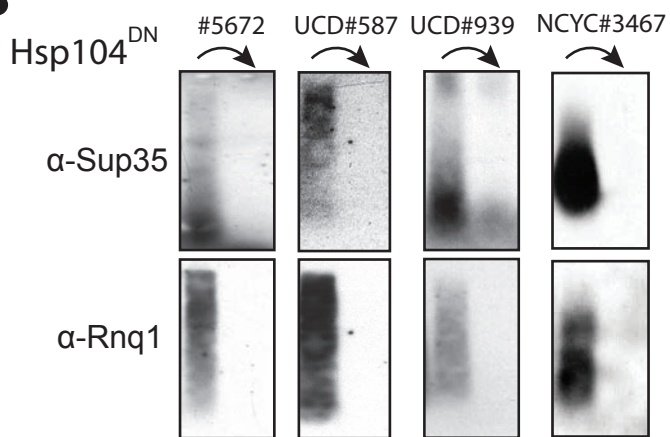

**C**

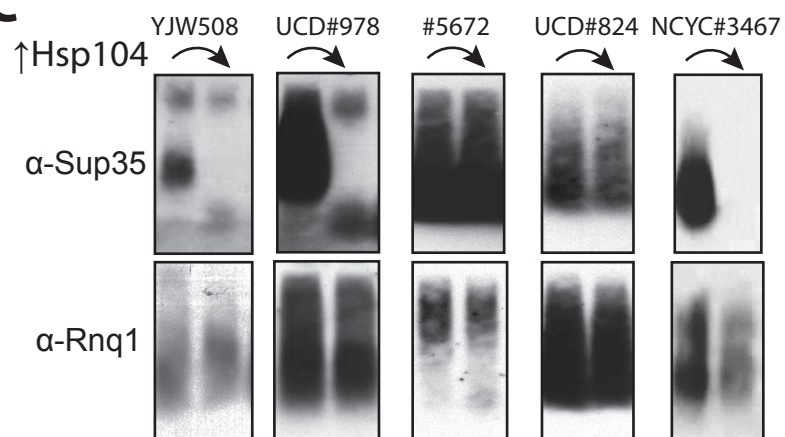

**D**

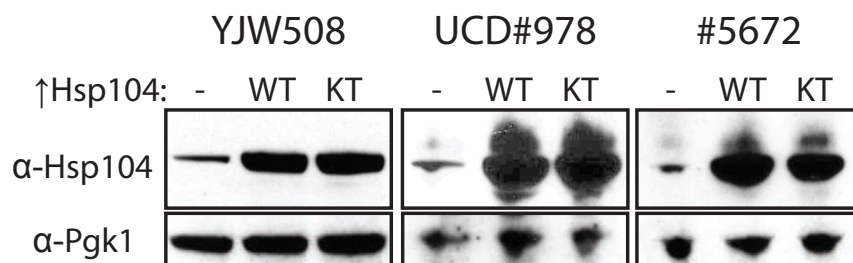

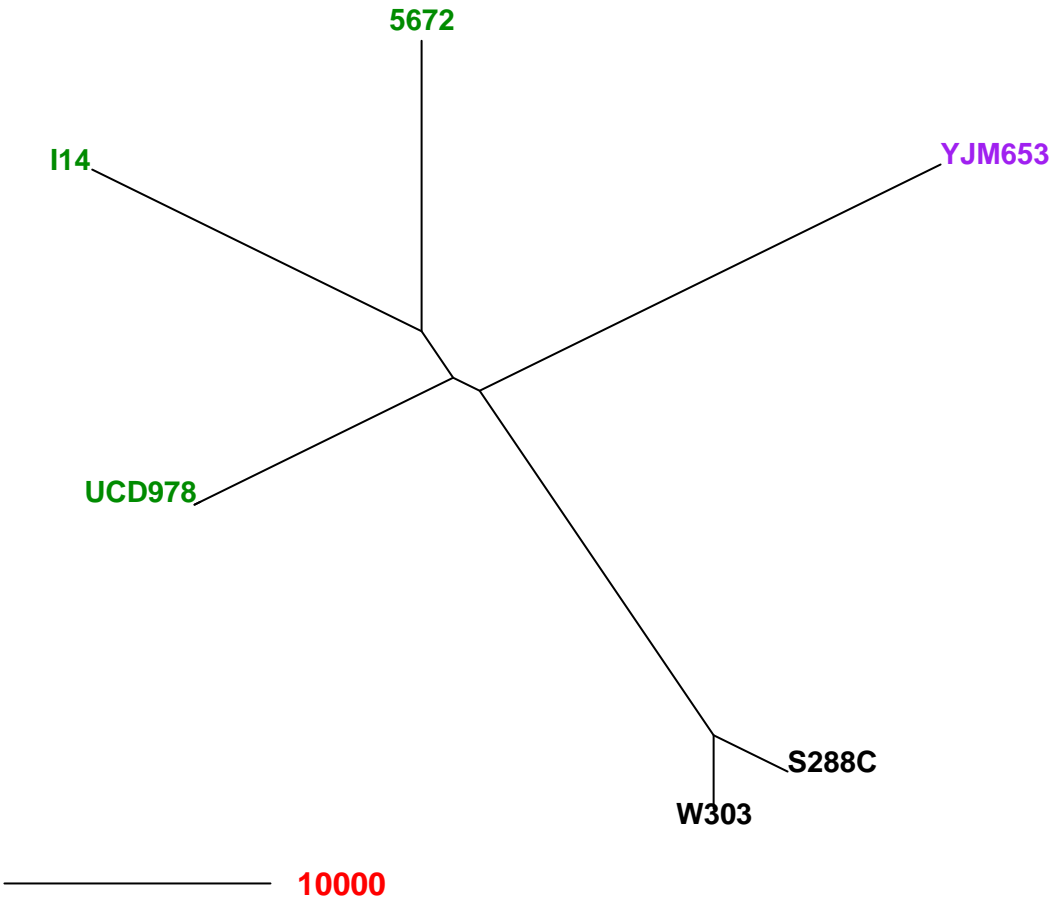

# Strain 5672: MMM medium

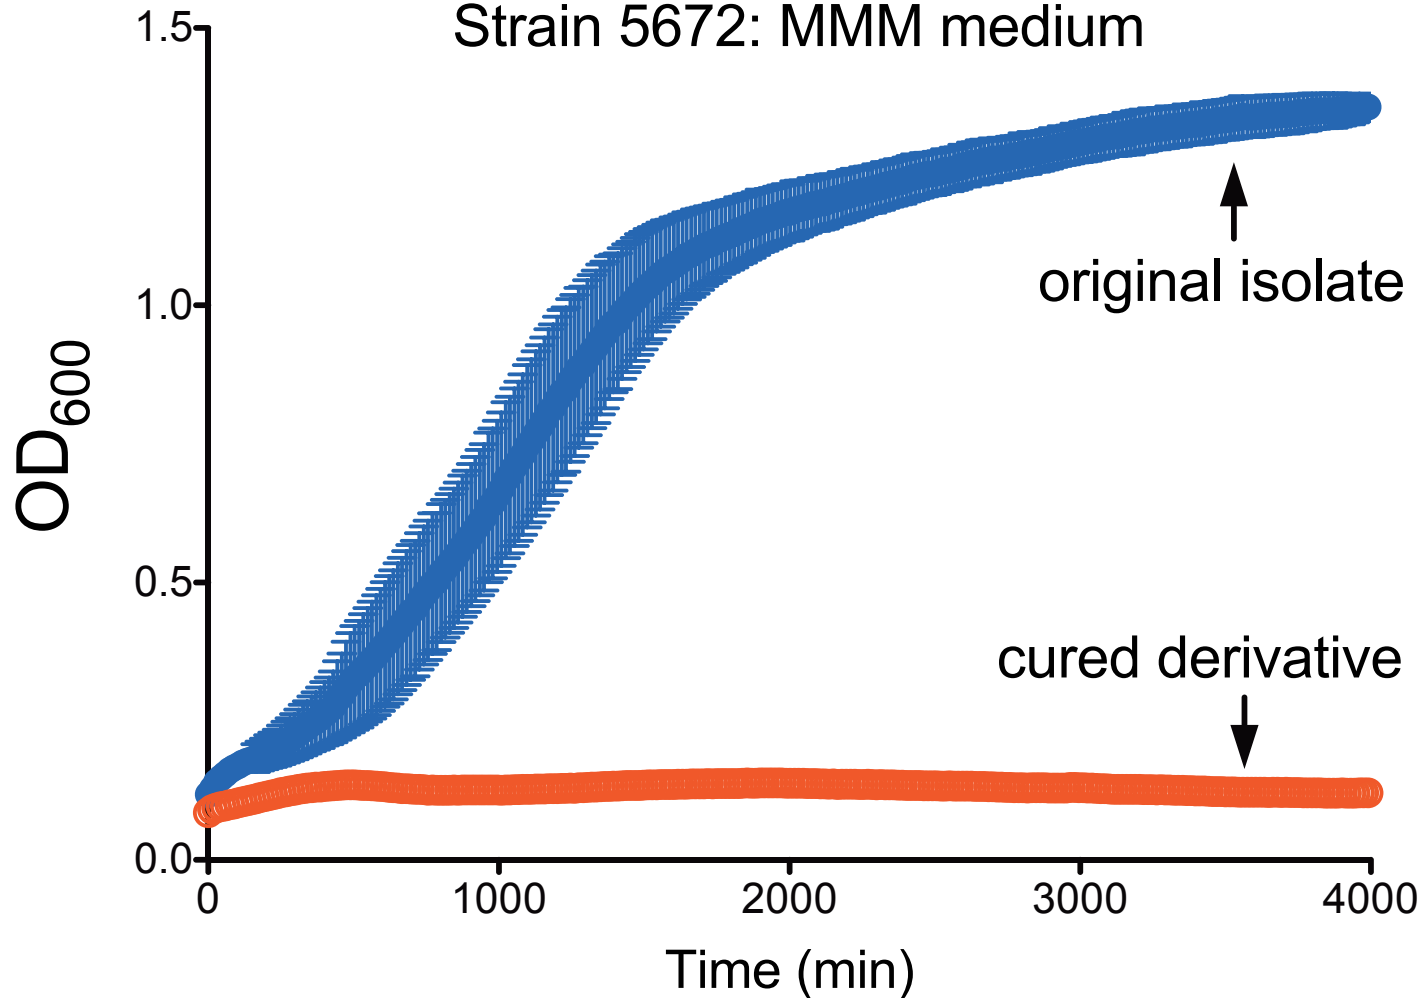



Figure S4

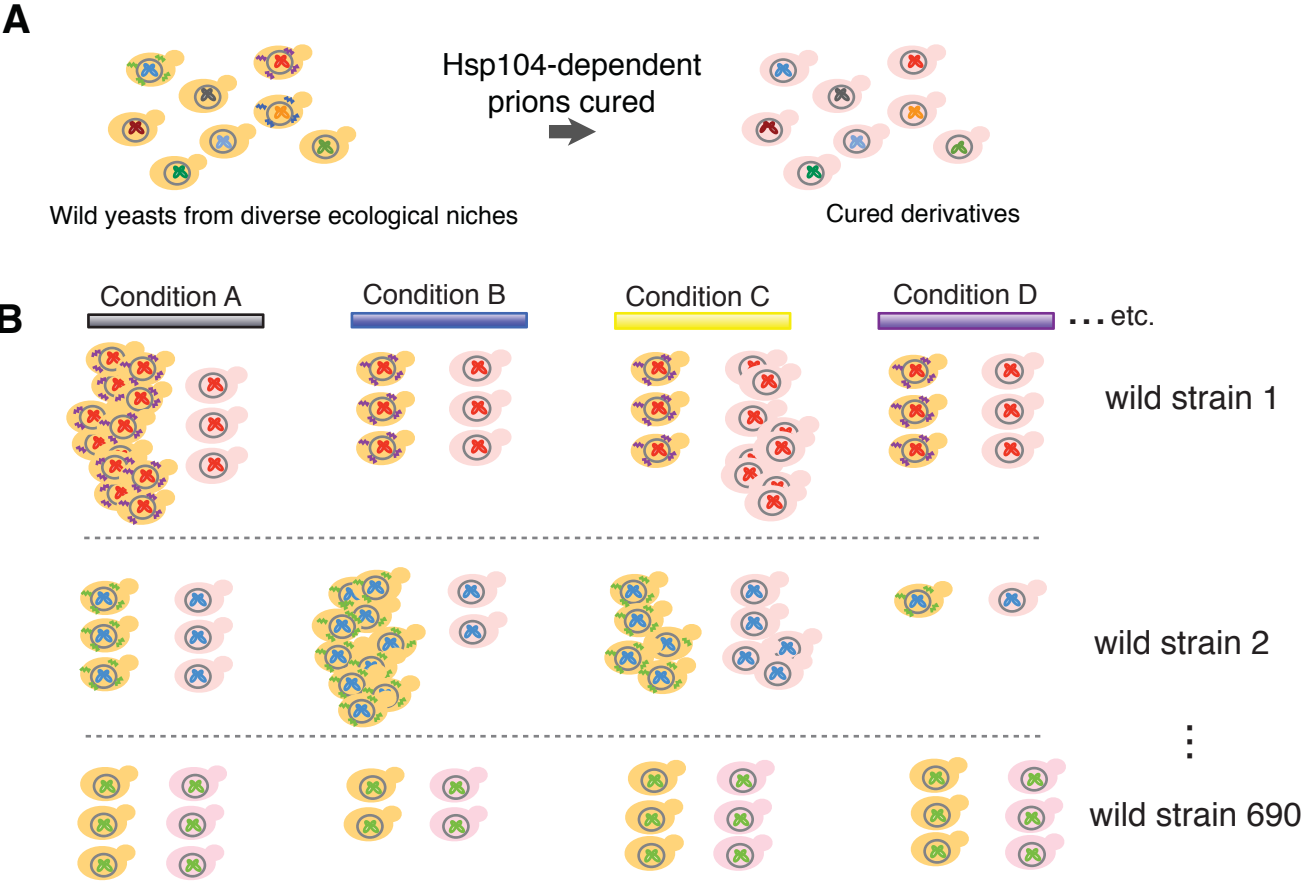

## **Supplementary Tables**

**Supplementary Table 1.** *Saccharomyces* strains used in this study, prions they harbor, and their curable phenotypes. Sample source abbreviations are: (ARSC). Agricultural Research Service Culture Collection; (NCYC) National Collection of Yeast Cultures.

| Strain       | <i>Saccharomyces</i><br>species | Ecotype | Origin                                                 | Source     | Prion<br>status  | Curable<br>phenotype?         | Condition                    | Cured with<br>dominant<br>negative<br>Hsp104? |
|--------------|---------------------------------|---------|--------------------------------------------------------|------------|------------------|-------------------------------|------------------------------|-----------------------------------------------|
|              | 5672 <i>cerevisiae</i>          | unknown | unknown                                                | ARSC*      | [RNQ+]<br>[PSI+] | improved<br>growth<br>reduced | minimal grape<br>must medium | -                                             |
| Abbey Ale    | <i>cerevisiae</i>               | beer    | brewing                                                | White Labs |                  | growth<br>reduced             | Acid                         | -                                             |
| ATCC 26249   | <i>cerevisiae</i>               | wine    | AWRI 729                                               | ATCC       |                  | growth<br>improved            | Base                         | Yes                                           |
| Belgian Ale  | <i>cerevisiae</i>               | beer    | brewing                                                | White Labs |                  | growth                        | YPD                          | -                                             |
| Budvar Lager | <i>cerevisiae</i>               | beer    | Czech republic brewery                                 | Wyeast     | [RNQ+]           |                               |                              |                                               |
| DBVPG1794    | <i>cerevisiae</i>               | soil    | soil, Finland                                          | DBVPG      |                  |                               |                              |                                               |
| EM93         | <i>cerevisiae</i>               | fruit   | rotting fig, Merced, California                        | ARSC       |                  |                               |                              |                                               |
| English Ale  | <i>cerevisiae</i>               | beer    | brewing                                                | White Labs |                  |                               |                              |                                               |
| F1411        | <i>cerevisiae</i>               | unknown | unknown                                                | Gerry Fink |                  |                               |                              |                                               |
| F1534        | <i>cerevisiae</i>               | wine    | Cabernet sauvignon must,<br>natural inoculum; Mortimer | Gerry Fink |                  |                               |                              |                                               |
| F1535        | <i>cerevisiae</i>               | wine    | Cabernet sauvignon must,<br>natural inoculum; Mortimer | Gerry Fink |                  | reduced<br>growth             | 4-NQO                        | Yes                                           |
| F1536        | <i>cerevisiae</i>               | wine    | Cabernet sauvignon must,<br>natural inoculum; Mortimer | Gerry Fink |                  |                               |                              |                                               |
| F1537        | <i>cerevisiae</i>               | wine    | Cabernet sauvignon must,<br>natural inoculum; Mortimer | Gerry Fink |                  |                               |                              |                                               |
| F1538        | <i>cerevisiae</i>               | wine    | Cabernet sauvignon must,<br>natural inoculum; Mortimer | Gerry Fink |                  |                               |                              |                                               |
| F1539        | <i>cerevisiae</i>               | wine    | Cabernet sauvignon must,<br>Mortimer                   | Gerry Fink |                  |                               |                              |                                               |

|       |                   |          |                                   |            |                 |              |     |
|-------|-------------------|----------|-----------------------------------|------------|-----------------|--------------|-----|
| F1540 | <i>cerevisiae</i> | wine     | Cabernet sauvignon must, Mortimer | Gerry Fink |                 |              |     |
| F1541 | <i>cerevisiae</i> | wine     | Cabernet sauvignon must, Mortimer | Gerry Fink |                 |              |     |
| F1542 | <i>cerevisiae</i> | wine     | Cabernet sauvignon must, Mortimer | Gerry Fink |                 |              |     |
| F1543 | <i>cerevisiae</i> | wine     | Cabernet sauvignon must, Mortimer | Gerry Fink |                 |              |     |
| F1544 | <i>cerevisiae</i> | wine     | zinfandel; Mortimer               | Gerry Fink |                 |              |     |
| F1545 | <i>cerevisiae</i> | wine     | zinfandel; Mortimer               | Gerry Fink | improved growth | Hydroxyurea  | Yes |
| F1546 | <i>cerevisiae</i> | wine     | zinfandel; Mortimer               | Gerry Fink |                 |              | -   |
| F1547 | <i>cerevisiae</i> | wine     | zinfandel; Mortimer               | Gerry Fink |                 |              | -   |
| F1548 | <i>cerevisiae</i> | wine     | zinfandel; Mortimer               | Gerry Fink | reduced growth  | 4-NQO        | Yes |
|       |                   |          |                                   |            | improved growth | YP-galactose | Yes |
| F1549 | <i>cerevisiae</i> | wine     | Cabernet sauvignon; Mortimer      | Gerry Fink |                 |              |     |
| F1550 | <i>cerevisiae</i> | wine     | Cabernet sauvignon; Mortimer      | Gerry Fink |                 |              |     |
| F1551 | <i>cerevisiae</i> | wine     | Cabernet sauvignon; Mortimer      | Gerry Fink |                 |              |     |
| F1552 | <i>cerevisiae</i> | wine     | Cabernet sauvignon; Mortimer      | Gerry Fink |                 |              |     |
| F1583 | <i>cerevisiae</i> | clinical | AIDS patient; Rubin               | Gerry Fink |                 |              |     |
| F1608 | <i>cerevisiae</i> | clinical | induced sputum; Rubin             | Gerry Fink |                 |              |     |
| F1619 | <i>cerevisiae</i> | clinical | Rubin                             | Gerry Fink |                 |              |     |
| F1620 | <i>cerevisiae</i> | clinical | larynx wash; Rubin                | Gerry Fink |                 |              |     |
| F1621 | <i>cerevisiae</i> | clinical | blood; Rubin                      | Gerry Fink |                 |              |     |
| F1622 | <i>cerevisiae</i> | clinical | sputum; Rubin                     | Gerry Fink |                 |              |     |
| F1623 | <i>cerevisiae</i> | clinical | pelvic drain; Rubin               | Gerry Fink |                 |              |     |

|       |                   |          |                            |            |        |                 |                 |
|-------|-------------------|----------|----------------------------|------------|--------|-----------------|-----------------|
| F1624 | <i>cerevisiae</i> | clinical | blood; Rubin               | Gerry Fink |        |                 |                 |
| F1625 | <i>cerevisiae</i> | clinical | bronch wash; Rubin         | Gerry Fink |        |                 |                 |
| F1626 | <i>cerevisiae</i> | clinical | sputum; Rubin              | Gerry Fink |        |                 |                 |
| F1627 | <i>cerevisiae</i> | clinical | lung wound; Rubin          | Gerry Fink |        |                 |                 |
| F1628 | <i>cerevisiae</i> | clinical | wound left arm; Rubin      | Gerry Fink | [RNQ+] |                 |                 |
| F1629 | <i>cerevisiae</i> | clinical | Rubin                      | Gerry Fink |        |                 |                 |
| F1630 | <i>cerevisiae</i> | clinical | blood; Rubin               | Gerry Fink |        |                 |                 |
| F1631 | <i>cerevisiae</i> | clinical | Rubin                      | Gerry Fink | [RNQ+] |                 |                 |
| F1632 | <i>cerevisiae</i> | clinical | Rubin                      | Gerry Fink | [RNQ+] |                 |                 |
| F1633 | <i>cerevisiae</i> | clinical | Rubin                      | Gerry Fink |        |                 |                 |
| F1634 | <i>cerevisiae</i> | clinical | Rubin                      | Gerry Fink |        | improved growth | 39C Yes         |
| F1635 | <i>cerevisiae</i> | clinical | bronch wash; Rubin         | Gerry Fink |        |                 |                 |
| F1636 | <i>cerevisiae</i> | clinical | Rubin                      | Gerry Fink |        |                 |                 |
| F1637 | <i>cerevisiae</i> | clinical | urine; Rubin               | Gerry Fink |        |                 |                 |
| F1638 | <i>cerevisiae</i> | clinical | peritoneal fluid; Rubin    | Gerry Fink |        |                 |                 |
| F1639 | <i>cerevisiae</i> | clinical | lft chest wall; Rubin      | Gerry Fink | [RNQ+] |                 |                 |
| F1640 | <i>cerevisiae</i> | clinical | Rubin                      | Gerry Fink |        | reduced growth  | Hydroxyurea Yes |
| F1641 | <i>cerevisiae</i> | clinical | blood; Rubin               | Gerry Fink |        |                 |                 |
| F1642 | <i>cerevisiae</i> | clinical | Rubin                      | Gerry Fink |        |                 |                 |
| F1643 | <i>cerevisiae</i> | clinical | wound; Rubin               | Gerry Fink |        |                 |                 |
| F1644 | <i>cerevisiae</i> | clinical | esophageal brushing; Rubin | Gerry Fink |        |                 |                 |
| F1645 | <i>cerevisiae</i> | clinical | blood; Rubin               | Gerry Fink |        | reduced growth  | Ethanol -       |
| F1646 | <i>cerevisiae</i> | clinical | Rubin                      | Gerry Fink |        |                 |                 |

|           |                   |          |                        |                 |        |                 |                 |
|-----------|-------------------|----------|------------------------|-----------------|--------|-----------------|-----------------|
| F1647     | <i>cerevisiae</i> | clinical | Rubin                  | Gerry Fink      |        |                 |                 |
| F1648     | <i>cerevisiae</i> | clinical | Rubin                  | Gerry Fink      |        |                 |                 |
| F1649     | <i>cerevisiae</i> | clinical | tongue; Rubin          | Gerry Fink      |        |                 |                 |
| F1650     | <i>cerevisiae</i> | clinical | blood; Rubin           | Gerry Fink      |        |                 |                 |
| F1651     | <i>cerevisiae</i> | clinical | stool; Rubin           | Gerry Fink      |        |                 |                 |
| F1652     | <i>cerevisiae</i> | clinical | pleural tissue; Rubin  | Gerry Fink      |        | reduced growth  | 4-NQO Yes       |
| F1653     | <i>cerevisiae</i> | clinical | abdominal wound; Rubin | Gerry Fink      | [RNQ+] |                 |                 |
| F1654     | <i>cerevisiae</i> | clinical | ovary pus; Rubin       | Gerry Fink      |        |                 |                 |
| F1655     | <i>cerevisiae</i> | clinical | bronch wash; Rubin     | Gerry Fink      |        |                 |                 |
| F1656     | <i>cerevisiae</i> | clinical | bronch wash; Rubin     | Gerry Fink      |        |                 |                 |
| F1657     | <i>cerevisiae</i> | clinical | urine; Rubin           | Gerry Fink      |        |                 |                 |
| F1658     | <i>cerevisiae</i> | clinical | tongue; Rubin          | Gerry Fink      |        |                 |                 |
| F1659     | <i>cerevisiae</i> | clinical | bronch wash; Rubin     | Gerry Fink      |        |                 |                 |
| F1660     | <i>cerevisiae</i> | clinical | Rubin                  | Gerry Fink      |        |                 |                 |
| F1661     | <i>cerevisiae</i> | clinical | Rubin                  | Gerry Fink      |        |                 |                 |
| F1662     | <i>cerevisiae</i> | clinical | body fluid; Rubin      | Gerry Fink      |        |                 |                 |
| F1667     | <i>cerevisiae</i> | unknown  | unknown                | Gerry Fink      |        |                 |                 |
| F1689     | <i>cerevisiae</i> | clinical | sputum; Rubin          | Gerry Fink      |        |                 |                 |
| F2089     | <i>cerevisiae</i> | wine     | Tokay 22 wine          | Gerry Fink      |        |                 |                 |
| Forbidden |                   |          |                        |                 |        | reduced growth  |                 |
| Fruit Ale | <i>cerevisiae</i> | beer     | brewing                | Wyeast          |        |                 | YP-maltose -    |
| Gambrinus |                   |          |                        |                 |        |                 |                 |
| Lager     | <i>cerevisiae</i> | beer     | brewing                | Wyeast          |        |                 |                 |
| I14       | <i>cerevisiae</i> | wine     | wine                   | Leonid Kruglyak |        | improved growth | Fluconazole Yes |
| Irish Ale | <i>cerevisiae</i> | beer     | brewing                | White Labs      |        |                 |                 |
|           | <i>cerevisiae</i> |          |                        |                 |        |                 |                 |
| NCYC 3264 | <i>boulardii</i>  | fruit    | Lici fruit, Indonesia. | NCYC            |        |                 |                 |

|           |                   |        |                                                                         |      |                 |     |     |
|-----------|-------------------|--------|-------------------------------------------------------------------------|------|-----------------|-----|-----|
| NCYC 3265 | <i>cerevisiae</i> | soil   | soil                                                                    | NCYC |                 |     |     |
| NCYC 3266 | <i>cerevisiae</i> | wine   | wine/lab                                                                | NCYC |                 |     |     |
| NCYC 3273 | <i>paradoxus</i>  | oak    | Exudate of Quercus mongolica, Ternei City, Russia.                      | NCYC |                 |     |     |
| NCYC 3274 | <i>paradoxus</i>  | insect | Drosophila, Tijuca Forest, Brazil.                                      | NCYC |                 |     |     |
| NCYC 3275 | <i>paradoxus</i>  | oak    | Exudate of Quercus mongolica, Ternei City, Russia.                      | NCYC |                 |     |     |
| NCYC 3276 | <i>paradoxus</i>  | oak    | Oak, Russia.<br>Bark of Quercus robur, Silwood park, Ascot, London, UK. | NCYC | reduced growth  | 39C | Yes |
| NCYC 3277 | <i>paradoxus</i>  | oak    | UK.                                                                     | NCYC |                 |     |     |
| NCYC 3278 | <i>paradoxus</i>  | oak    | Oak, London, UK.                                                        | NCYC |                 |     |     |
| NCYC 3279 | <i>paradoxus</i>  | soil   | Soil beneath Q. velutina, Pennsylvania, USA.                            | NCYC |                 |     |     |
| NCYC 3280 | <i>paradoxus</i>  | oak    | Oak, London, UK.                                                        | NCYC |                 |     |     |
| NCYC 3281 | <i>paradoxus</i>  | oak    | Oak, London, UK.                                                        | NCYC |                 |     |     |
| NCYC 3282 | <i>paradoxus</i>  | oak    | Oak, London, UK.                                                        | NCYC |                 |     |     |
| NCYC 3283 | <i>paradoxus</i>  | oak    | Oak, London, UK.<br>Soil beneath Q. alba, Pennsylvania, USA             | NCYC | improved growth | YPD | -   |
| NCYC 3284 | <i>cerevisiae</i> | soil   | Pennsylvania, USA                                                       | NCYC |                 |     |     |
| NCYC 3285 | <i>paradoxus</i>  | guano  | Guano, Italy.                                                           | NCYC |                 |     |     |
| NCYC 3286 | <i>paradoxus</i>  | oak    | Oak, London, UK.                                                        | NCYC |                 |     |     |
| NCYC 3287 | <i>paradoxus</i>  | oak    | Exudate of Quercus mongolica, Cape Peschannyi, Vladivostok, Russia.     | NCYC |                 |     |     |
| NCYC 3288 | <i>paradoxus</i>  | soil   | Soil of moor, Denmark.                                                  | NCYC | reduced growth  | YPD | -   |

|           |                             |             |                                                                                    |      |                      |                 |           |
|-----------|-----------------------------|-------------|------------------------------------------------------------------------------------|------|----------------------|-----------------|-----------|
| NCYC 3289 | <i>paradoxus cerevisiae</i> | insect      | Drosophila, Davis, California, USA.                                                | NCYC |                      |                 |           |
| NCYC 3290 | <i>manginii</i>             | wine        | Bili Wine, West Africa.                                                            | NCYC |                      |                 |           |
| NCYC 3311 | <i>cerevisiae</i>           | soil        | Soil, Turku, Finland                                                               | NCYC | [MOT3 improved<br>+] | growth          | pH 4 -    |
| NCYC 3312 | <i>cerevisiae</i>           | soil        | Soil, Netherlands.                                                                 | NCYC |                      |                 |           |
| NCYC 3313 | <i>cerevisiae</i>           | grain       | White tecc, Ethiopia.                                                              | NCYC |                      |                 |           |
| NCYC 3314 | <i>cerevisiae</i>           | wine        | Barrel fermentation, Napa Valley, USA.                                             | NCYC |                      |                 |           |
| NCYC 3315 | <i>cerevisiae</i>           | oak         | Oak, Woodland, Pennsylvania.                                                       | NCYC |                      |                 |           |
| NCYC 3316 | <i>paradoxus</i>            | oak         | Oak, Montreal , Canada                                                             | NCYC |                      |                 |           |
| NCYC 3317 | <i>paradoxus</i>            | oak         | Oak, Montreal, Canada                                                              | NCYC |                      |                 |           |
| NCYC 3318 | <i>cerevisiae</i>           | wine        | Wine fermentation, Maule Region, Chile.                                            | NCYC |                      |                 |           |
| NCYC 3319 | <i>cerevisiae</i>           | wine        | Wine fermentation, Maule Region, Chile.                                            | NCYC |                      |                 |           |
| NCYC 3335 | <i>paradoxus</i>            | oak         | Oak, London, UK                                                                    | NCYC |                      |                 |           |
| NCYC 3336 | <i>paradoxus</i>            | oak         | Oak, London UK.                                                                    | NCYC |                      |                 |           |
| NCYC 3337 | <i>paradoxus</i>            | oak         | Oak, London UK.                                                                    | NCYC |                      |                 |           |
| NCYC 3377 | <i>paradoxus</i>            | oak         | Exudate of Quercus robur, Central Siberian Botanical Garden, Novo Sibirsk, Russia. | NCYC |                      | improved growth | YPD -     |
| NCYC 3445 | <i>cerevisiae</i>           | wine        | Palm Wine, Africa.                                                                 | NCYC |                      |                 |           |
| NCYC 3447 | <i>cerevisiae</i>           | grapes/must | Isolated from Grapes, Australia.                                                   | NCYC |                      |                 |           |
| NCYC 3448 | <i>cerevisiae</i>           | fruit       | Fruit of Opuntia stricta, Bahamas.                                                 | NCYC |                      |                 |           |
| NCYC 3449 | <i>cerevisiae</i>           | fruit       | Cladode of Opuntia megacantha, Hawaii                                              | NCYC |                      | improved growth | 4-NQO Yes |



|           |                                         |          |                                                                                                      |      |  |                |            |                  |
|-----------|-----------------------------------------|----------|------------------------------------------------------------------------------------------------------|------|--|----------------|------------|------------------|
| NCYC 3451 | <i>cerevisiae</i><br><i>diastaticus</i> | beer     | Beer spoilage strain, from wort in Irish brewery.                                                    | NCYC |  |                |            |                  |
| NCYC 3452 | <i>cerevisiae</i>                       | sake     | Shochu Sake strain, Japan                                                                            | NCYC |  |                |            |                  |
| NCYC 3453 | <i>cerevisiae</i>                       | baking   | Baker's strain, Netherlands                                                                          | NCYC |  |                |            | [RNQ+]           |
| NCYC 3454 | <i>cerevisiae</i>                       | baking   | Le Saffre Baker's strain, Singapore                                                                  | NCYC |  |                |            | [RNQ+]           |
| NCYC 3455 | <i>cerevisiae</i>                       | clinical | Clinical isolate (Throat-sputum), Newcastle, UK                                                      | NCYC |  |                |            |                  |
| NCYC 3456 | <i>cerevisiae</i>                       | clinical | Clinical Isolate (Sputum), Newcastle, UK                                                             | NCYC |  |                |            |                  |
| NCYC 3457 | <i>cerevisiae</i>                       | clinical | Clinical isolate (Fecal), Newcastle, UK                                                              | NCYC |  |                |            |                  |
| NCYC 3458 | <i>cerevisiae</i>                       | clinical | Clinical isolate (Vaginal), Bergamo, Italy.                                                          | NCYC |  |                |            |                  |
| NCYC 3460 | <i>cerevisiae</i>                       | sake     | Ragi (Sake type wine), Japan.                                                                        | NCYC |  | reduced growth | YP-maltose | Yes              |
| NCYC 3461 | <i>cerevisiae</i><br><i>uvarum</i>      | fruit    | Nectar of Bertam Palm, Malaysia.                                                                     | NCYC |  |                |            |                  |
| NCYC 3462 | <i>cerevisiae</i>                       | fruit    | Nectar of Bertam Palm, Malaysia.                                                                     | NCYC |  |                |            |                  |
| NCYC 3466 | <i>cerevisiae</i>                       | fruit    | Lab strain derived from crosses of wild strains (EM93 and EM126 isolated from rotting figs, Californ | NCYC |  |                |            | [RNQ+]           |
| NCYC 3467 | <i>cerevisiae</i>                       | unknown  | lab strain W303 Bertam Palm, Trigona,                                                                | NCYC |  |                |            | [RNQ+]<br>[PSI+] |
| NCYC 3468 | <i>cerevisiae</i><br><i>cerevisiae</i>  | fruit    | Malaysia                                                                                             | NCYC |  |                |            |                  |
| NCYC 3469 | <i>fructum</i>                          | wine     | Fermenting Fruit Juice, Netherlands.                                                                 | NCYC |  |                |            |                  |
| NCYC 3470 | <i>cerevisiae</i>                       | wine     | Wine, Sauternes, France.                                                                             | NCYC |  |                |            |                  |

|               |                   |          |                                                     |                     |                 |            |     |
|---------------|-------------------|----------|-----------------------------------------------------|---------------------|-----------------|------------|-----|
| NCYC 3471     | <i>cerevisiae</i> | clinical | Clinical isolate (vaginal), Bergamo, Italy.         | NCYC                |                 |            |     |
| NCYC 3472     | <i>cerevisiae</i> | clinical | Clinical isolate (vaginal), Bergamo, Italy.         | NCYC                |                 |            |     |
| NCYC 3473     | <i>paradoxus</i>  | oak      | Oak, London, UK                                     | NCYC                |                 |            |     |
| NCYC 3474     | <i>paradoxus</i>  | oak      | Oak, London, UK                                     | NCYC                |                 |            |     |
| NCYC 3475     | <i>paradoxus</i>  | oak      | Oak, London, UK                                     | NCYC                |                 |            |     |
| NCYC 3476     | <i>paradoxus</i>  | oak      | Oak, London, UK                                     | NCYC                |                 |            |     |
| NCYC 3477     | <i>paradoxus</i>  | oak      | Oak, London, UK                                     | NCYC                |                 |            |     |
| NCYC 3478     | <i>paradoxus</i>  | oak      | Oak, London, UK                                     | NCYC                |                 |            |     |
| NCYC 3479     | <i>paradoxus</i>  | oak      | Oak, London, UK                                     | NCYC                |                 |            |     |
| NCYC 3480     | <i>paradoxus</i>  | oak      | Oak, Russia                                         | NCYC                |                 |            |     |
| NCYC 3481     | <i>paradoxus</i>  | oak      | Oak, London, UK                                     | NCYC                |                 |            |     |
| NCYC 3482     | <i>paradoxus</i>  | oak      | Oak, Siberia                                        | NCYC                |                 |            |     |
| NCYC 3483     | <i>paradoxus</i>  | insect   | Drosophila, Catalao point, Brazil                   | NCYC                |                 |            |     |
| NCYC 3484     | <i>paradoxus</i>  | oak      | Oak, Japan                                          | NCYC                |                 |            |     |
| NCYC 3485     | <i>paradoxus</i>  | fruit    | Myoporium flux, Hawaii                              | NCYC                |                 |            |     |
| NCYC 3486     | <i>chevalieri</i> | beer     | Ginger Beer from <i>Z. officinale</i> , West Africa | NCYC                |                 |            |     |
| NCYC 3487     | <i>cerevisiae</i> | baking   | Baker's strain, Australia.                          | NCYC                | [RNQ+]          |            |     |
| Northwest Ale | <i>cerevisiae</i> | beer     | brewing                                             | Wyeast              |                 |            |     |
| OP1           | <i>cerevisiae</i> | soil     | Occonechee Park, VA                                 | Dietzmann, Dietrich |                 |            |     |
| OP10          | <i>cerevisiae</i> | soil     | Occonechee Park, VA                                 | Dietzmann, Dietrich | improved growth | YP-maltose | Yes |
| OP2           | <i>cerevisiae</i> | soil     | Occonechee Park, VA                                 | Dietzmann, Dietrich |                 |            |     |
| OP3           | <i>cerevisiae</i> | soil     | Occonechee Park, VA                                 | Dietzmann, Dietrich |                 |            |     |
| OP4           | <i>cerevisiae</i> | soil     | Occonechee Park, VA                                 | Dietzmann, Dietrich |                 |            |     |
| OP6           | <i>cerevisiae</i> | soil     | Occonechee Park, VA                                 | Dietzmann, Dietrich |                 |            |     |

|              |                   |               |                                               |                                                    |                |             |     |
|--------------|-------------------|---------------|-----------------------------------------------|----------------------------------------------------|----------------|-------------|-----|
| OP7          | <i>cerevisiae</i> | soil          | Occonechee Park, VA                           | Dietzmann, Dietrich                                |                |             |     |
| OP8          | <i>cerevisiae</i> | soil          | Occonechee Park, VA                           | Dietzmann, Dietrich                                |                |             |     |
| OP9          | <i>cerevisiae</i> | soil          | Occonechee Park, VA                           | Dietzmann, Dietrich                                |                |             |     |
| SK1          | <i>cerevisiae</i> | soil          | soil, USA                                     | Leland Hartwell                                    |                |             |     |
| SM1          | <i>cerevisiae</i> | soil          | Stone Mountain, GA                            | Dietzmann, Dietrich                                |                |             |     |
| SM12         | <i>cerevisiae</i> | soil          | Stone Mountain, GA                            | Dietzmann, Dietrich                                |                |             |     |
| SM17         | <i>cerevisiae</i> | soil          | Stone Mountain, GA                            | Dietzmann, Dietrich                                |                |             |     |
| SM2          | <i>cerevisiae</i> | soil          | Stone Mountain, GA                            | Dietzmann, Dietrich                                | reduced growth | Fluconazole | Yes |
| SM66         | <i>cerevisiae</i> | soil          | Stone Mountain, GA                            | Dietzmann, Dietrich                                |                |             |     |
| SM69         | <i>cerevisiae</i> | soil          | Stone Mountain, GA                            | Dietzmann, Dietrich                                | reduced growth | Base        | No  |
| T73          | <i>cerevisiae</i> | wine          | wine                                          | Leonid Kruglyak                                    |                |             |     |
| Trappist Ale | <i>cerevisiae</i> | beer          | brewing                                       | White Labs                                         |                |             |     |
| UCD690       |                   | <i>O</i> wine | Wine, 1979, unioctulated UC Davis wine        | Viticulture and Enology Yeast Collection, UC Davis | reduced growth | Base        | -   |
| UCD762       |                   | <i>O</i> wine | Wine yeast, cold tolerant, Italy, 1984        | Viticulture and Enology Yeast Collection, UC Davis | reduced growth | Base        | -   |
| UCD1038      | <i>cerevisiae</i> | unknown       | Obtained from C. Lindegren (09/1945)          | Viticulture and Enology Yeast Collection, UC Davis | reduced growth | 4-NQO       | -   |
| UCD1044      | <i>cerevisiae</i> | wine          | Red Star Premeir Cuvee Irajii Honori isolates | Viticulture and Enology Yeast Collection, UC Davis | reduced growth | Ethanol     | -   |
|              |                   |               |                                               |                                                    | reduced growth | 4-NQO       | -   |
|              |                   |               |                                               |                                                    | reduced growth | Ethanol     | -   |
|              |                   |               |                                               |                                                    | reduced growth | Fluconazole | -   |
|              |                   |               |                                               |                                                    | reduced growth | YP-maltose  | -   |

|         |                     |             |                                                             |                                                    |                |             |   |
|---------|---------------------|-------------|-------------------------------------------------------------|----------------------------------------------------|----------------|-------------|---|
| UCD1047 | <i>cerevisiae</i>   | wine        | Commercial dry wine yeast                                   | Viticulture and Enology Yeast Collection, UC Davis | reduced growth | Ethanol     | - |
| UCD105  | <i>cerevisiae</i>   | wine        | wine                                                        | Viticulture and Enology Yeast Collection, UC Davis |                |             |   |
| UCD1109 | <i>cerevisiae</i>   | grapes/must | must                                                        | Viticulture and Enology Yeast Collection, UC Davis | reduced growth | 4-NQO       | - |
|         |                     |             |                                                             |                                                    | reduced growth | Fluconazole | - |
|         |                     |             |                                                             |                                                    | reduced growth | Hydroxyurea | - |
|         |                     |             |                                                             |                                                    | reduced growth | pH 9        | - |
|         |                     |             |                                                             |                                                    | reduced growth | YP-glycerol | - |
| UCD1114 | <i>cerevisiae</i>   | unknown     | ATCC through J. Castor, (06/01/47), ATCC 4360               | Viticulture and Enology Yeast Collection, UC Davis |                |             |   |
| UCD1144 | <i>cerevisiae</i>   | unknown     | L. Hohl, Division of Fruit Products (1945), UCB, California | Viticulture and Enology Yeast Collection, UC Davis |                |             |   |
| UCD1146 | <i>kudriavzevii</i> | wine        | wine                                                        | Viticulture and Enology Yeast Collection, UC Davis | reduced growth | Ethanol     | - |
|         |                     |             |                                                             |                                                    | reduced growth | Fluconazole | - |
|         |                     |             |                                                             |                                                    | reduced growth | pH 4        | - |
| UCD1148 | <i>cerevisiae</i>   | wine        | wine, California, 1935                                      | Viticulture and Enology Yeast Collection, UC Davis |                |             |   |
|         |                     |             | L. Hohl, Division of Fruit Products (1945), UCB, California |                                                    |                |             |   |
| UCD1149 | <i>cerevisiae</i>   | unknown     | California                                                  | Viticulture and Enology Yeast Collection, UC Davis | reduced growth | Fluconazole | - |
|         |                     |             |                                                             |                                                    | reduced growth | NaCl        | - |

|         |                   |         |                                                                                                                       |                                                    |                       |              |   |
|---------|-------------------|---------|-----------------------------------------------------------------------------------------------------------------------|----------------------------------------------------|-----------------------|--------------|---|
| UCD1152 | <i>cerevisiae</i> | wine    | winery                                                                                                                | Viticulture and Enology Yeast Collection, UC Davis | reduced growth        | 4-NQO        | - |
|         |                   |         |                                                                                                                       |                                                    | reduced growth        | Fluconazole  | - |
|         |                   |         |                                                                                                                       |                                                    | reduced growth        | YP-galactose | - |
| UCD1162 | <i>cerevisiae</i> | unknown | L. Hohl, Division of Fruit Products (1945), UCB, California; Possible flor yeast based on analysis by Jean-Luc LeGras | Viticulture and Enology Yeast Collection, UC Davis | reduced growth        | Fluconazole  | - |
| UCD1165 | <i>cerevisiae</i> | unknown | L. Hohl, Division of Fruit Products (1945), UCB, California                                                           | Viticulture and Enology Yeast Collection, UC Davis | reduced growth        | Ethanol      | - |
|         |                   |         |                                                                                                                       |                                                    | reduced growth        | Fluconazole  | - |
| UCD1166 | <i>cerevisiae</i> | unknown | Obtained from B. Porchet (1940) Switzerland                                                                           | Viticulture and Enology Yeast Collection, UC Davis | [RNQ+] reduced growth | 4-NQO        | - |
|         |                   |         |                                                                                                                       |                                                    | reduced growth        | Fluconazole  | - |
| UCD1167 | <i>cerevisiae</i> | unknown | Fruit Products Collection (1940) UCB, California                                                                      | Viticulture and Enology Yeast Collection, UC Davis |                       |              |   |
| UCD1168 | <i>cerevisiae</i> | unknown | Fruit Products Collection (1940) UCB, California                                                                      | Viticulture and Enology Yeast Collection, UC Davis |                       |              |   |
| UCD1169 | <i>cerevisiae</i> | unknown | Fruit Products Collection (1940) UCB, California                                                                      | Viticulture and Enology Yeast Collection, UC Davis |                       |              |   |
| UCD1172 | <i>cerevisiae</i> | unknown | Fruit Products Collection (1940) UCB, California                                                                      | Viticulture and Enology Yeast Collection, UC Davis |                       |              |   |
| UCD1173 | <i>cerevisiae</i> | unknown | Fruit Products Collection (1940) UCB, California                                                                      | Viticulture and Enology Yeast Collection, UC Davis |                       |              |   |
| UCD1174 | <i>cerevisiae</i> | unknown | misidentified in Viticulture and Enology                                                                              | Viticulture and Enology Yeast Collection, UC Davis | reduced growth        | YP-glycerol  | - |

|         |                    |             |                                                  |                                                    |                |             |   |
|---------|--------------------|-------------|--------------------------------------------------|----------------------------------------------------|----------------|-------------|---|
| UCD1175 | <i>cerevisiae</i>  | unknown     | Fruit Products Collection (1940) UCB, California | Viticulture and Enology Yeast Collection, UC Davis | reduced growth | YP-maltose  | - |
| UCD1176 | <i>cerevisiae?</i> | unknown     | Fruit Products Collection (1940) UCB, California | Viticulture and Enology Yeast Collection, UC Davis |                |             |   |
| UCD1177 | <i>cerevisiae</i>  | wine        | winery, Europe                                   | Viticulture and Enology Yeast Collection, UC Davis |                |             |   |
| UCD1178 | <i>cerevisiae</i>  | unknown     | Fruit Products Collection (1940) UCB, California | Viticulture and Enology Yeast Collection, UC Davis | reduced growth | Fluconazole | - |
| UCD1180 | <i>cerevisiae</i>  | wine        | wine, Riesling                                   | Viticulture and Enology Yeast Collection, UC Davis | reduced growth | 4-NQO       | - |
|         |                    |             |                                                  |                                                    | reduced growth | Hydroxyurea | - |
|         |                    |             |                                                  |                                                    | reduced growth | YP-glycerol | - |
| UCD1181 | <i>cerevisiae</i>  | wine        | wine, Riesling                                   | Viticulture and Enology Yeast Collection, UC Davis |                |             |   |
| UCD1182 | <i>cerevisiae</i>  | wine        | winery, Europe                                   | Viticulture and Enology Yeast Collection, UC Davis |                |             |   |
| UCD1186 | <i>cerevisiae</i>  | grapes/must | grape, California                                | Viticulture and Enology Yeast Collection, UC Davis |                |             |   |
| UCD1187 | <i>cerevisiae</i>  | wine        | wine, Sauterne                                   | Viticulture and Enology Yeast Collection, UC Davis |                |             |   |
| UCD1210 | <i>cerevisiae</i>  | fruit       | Fig, California, fermenting                      | Viticulture and Enology Yeast Collection, UC Davis |                |             |   |
| UCD1212 | <i>cerevisiae</i>  | grapes/must | FM grapes, Brazil                                | Viticulture and Enology Yeast Collection, UC Davis |                |             |   |
| UCD1213 | <i>cerevisiae</i>  | wine        | wine, Rimac, Peru                                | Viticulture and Enology Yeast Collection, UC Davis |                |             |   |
| UCD1219 | <i>cerevisiae</i>  | beer        | Beer brewing strain                              | Viticulture and Enology Yeast Collection, UC Davis |                |             |   |
| UCD1222 | <i>cerevisiae</i>  | grapes/must | grapes, Thompsons seedless, California           | Viticulture and Enology Yeast Collection, UC Davis |                |             |   |

|         |                   |             |                                         |                                                    |                 |             |   |  |
|---------|-------------------|-------------|-----------------------------------------|----------------------------------------------------|-----------------|-------------|---|--|
| UCD1223 | <i>cerevisiae</i> | grapes/must | grapes, Thompson's seedless, California | Viticulture and Enology Yeast Collection, UC Davis |                 |             |   |  |
| UCD1224 | <i>cerevisiae</i> | grapes/must | must, Thompson seedless, California     | Viticulture and Enology Yeast Collection, UC Davis |                 |             |   |  |
| UCD1225 | <i>cerevisiae</i> | grapes/must | must, Muscat, California                | Viticulture and Enology Yeast Collection, UC Davis | improved growth | Fluconazole | - |  |
| UCD1226 | <i>cerevisiae</i> | grapes/must | must, California                        | Viticulture and Enology Yeast Collection, UC Davis |                 |             |   |  |
| UCD1227 | <i>cerevisiae</i> | grapes/must | must, California                        | Viticulture and Enology Yeast Collection, UC Davis |                 |             |   |  |
| UCD1229 | <i>cerevisiae</i> | wine        | wine, California                        | Viticulture and Enology Yeast Collection, UC Davis | reduced growth  | Ethanol     | - |  |
| UCD1230 | <i>cerevisiae</i> | grapes/must | must, Semillon, California              | Viticulture and Enology Yeast Collection, UC Davis |                 |             |   |  |
| UCD1231 | <i>cerevisiae</i> | grapes/must | must, California                        | Viticulture and Enology Yeast Collection, UC Davis | improved growth | 4-NQO       | - |  |
| UCD1232 | <i>cerevisiae</i> | grapes/must | must, California                        | Viticulture and Enology Yeast Collection, UC Davis |                 |             |   |  |
| UCD1233 | <i>cerevisiae</i> | grapes/must | must, Concord, California               | Viticulture and Enology Yeast Collection, UC Davis | improved growth | 4-NQO       | - |  |
|         |                   |             |                                         |                                                    | improved growth | Ethanol     | - |  |
|         |                   |             |                                         |                                                    | improved growth | Fluconazole | - |  |
| UCD1234 | <i>cerevisiae</i> | grapes/must | must, concord, California               | Viticulture and Enology Yeast Collection, UC Davis | improved growth | Fluconazole | - |  |
| UCD1235 | <i>cerevisiae</i> | grapes/must | must, Muscat, California                | Viticulture and Enology Yeast Collection, UC Davis |                 |             |   |  |
| UCD1244 | <i>cerevisiae</i> | grapes/must | grape, Chasselas, California            | Viticulture and Enology Yeast Collection, UC Davis |                 |             |   |  |
| UCD1245 | <i>cerevisiae</i> | grapes/must | grape, Alicante, California             | Viticulture and Enology Yeast Collection, UC Davis | reduced growth  | Ethanol     | - |  |

|         |                   |             |                                                |                                                    |                 |              |   |
|---------|-------------------|-------------|------------------------------------------------|----------------------------------------------------|-----------------|--------------|---|
| UCD1246 | <i>cerevisiae</i> | grapes/must | grape, Muscat, California                      | Viticulture and Enology Yeast Collection, UC Davis |                 |              |   |
| UCD1248 | <i>cerevisiae</i> | grapes/must | must, Muscat, California                       | Viticulture and Enology Yeast Collection, UC Davis |                 |              |   |
| UCD1250 | <i>cerevisiae</i> | grapes/must | pomace, red, California, wine                  | Viticulture and Enology Yeast Collection, UC Davis |                 |              |   |
| UCD1251 | <i>cerevisiae</i> | grapes/must | pomace, white, California, wine                | Viticulture and Enology Yeast Collection, UC Davis |                 |              |   |
| UCD1252 | <i>cerevisiae</i> | grapes/must | must, white, California                        | Viticulture and Enology Yeast Collection, UC Davis |                 |              |   |
| UCD1253 | <i>cerevisiae</i> | grapes/must | grapes, Thompson Seedless & Malaga, California | Viticulture and Enology Yeast Collection, UC Davis | improved growth | Ethanol      | - |
| UCD1254 | <i>cerevisiae</i> | wine        | wine, muscat, California                       | Viticulture and Enology Yeast Collection, UC Davis | reduced growth  | pH 9         | - |
| UCD1256 | <i>cerevisiae</i> | wine        | Tokay yeast preparation, wine                  | Viticulture and Enology Yeast Collection, UC Davis | improved growth | 4-NQO        | - |
| UCD1257 | <i>cerevisiae</i> | grapes/must | grapes, Tokay, California                      | Viticulture and Enology Yeast Collection, UC Davis |                 |              | - |
| UCD1259 | <i>cerevisiae</i> | grapes/must | must, California                               | Viticulture and Enology Yeast Collection, UC Davis | reduced growth  | Ethanol      | - |
| UCD126  | <i>cerevisiae</i> | unknown     | Mrak 1948, Sacch. uvarum                       | Viticulture and Enology Yeast Collection, UC Davis | reduced growth  | Ethanol      | - |
| UCD1260 | <i>cerevisiae</i> | wine        | wine, sweet                                    | Viticulture and Enology Yeast Collection, UC Davis | improved growth | 4-NQO        | - |
| UCD1263 | <i>cariocanus</i> | wine        | France, grape or wine                          | Viticulture and Enology Yeast Collection, UC Davis | improved growth | YP-galactose | - |
| UCD1260 | <i>cerevisiae</i> | wine        | wine, sweet                                    | Viticulture and Enology Yeast Collection, UC Davis | reduced growth  | Ethanol      | - |



|         |                   |             |                                                                                                                 |                                                    |                |             |   |
|---------|-------------------|-------------|-----------------------------------------------------------------------------------------------------------------|----------------------------------------------------|----------------|-------------|---|
| UCD1265 | <i>cerevisiae</i> | beer        | Ale, beer, USA                                                                                                  | Viticulture and Enology Yeast Collection, UC Davis | reduced growth | 4-NQO       | - |
|         |                   |             |                                                                                                                 |                                                    | reduced growth | YP-maltose  | - |
| UCD1267 | <i>cerevisiae</i> | beer        | Ale, beer, USA                                                                                                  | Viticulture and Enology Yeast Collection, UC Davis |                |             |   |
| UCD1268 | <i>cerevisiae</i> | beer        | Ale, beer, USA                                                                                                  | Viticulture and Enology Yeast Collection, UC Davis |                |             |   |
| UCD1273 | <i>cerevisiae</i> | unknown     | Killer yeast, from Wickner: Wickner RB, Leibowitz MJ. J. Mol. Biol. 105: 427-443, 1976.                         | Viticulture and Enology Yeast Collection, UC Davis |                |             |   |
| UCD1282 | <i>cerevisiae</i> | grapes/must | Grape, Jundiri, Brazil                                                                                          | Viticulture and Enology Yeast Collection, UC Davis |                |             |   |
| UCD13   | <i>cerevisiae</i> | unknown     | Possibly an original "lab" yeast from Castor to Mrak in 1940, "P-CN of Stier and Castor"                        | Viticulture and Enology Yeast Collection, UC Davis |                |             |   |
| UCD1419 | <i>cerevisiae</i> | beer        | Denmark, beer distillery, Australia,                                                                            | Viticulture and Enology Yeast Collection, UC Davis |                |             |   |
| UCD1427 | <i>cerevisiae</i> | distilling  | fermentation<br>"Culture obtained from Waite Institute, original # J16 (1947)" "Adelaide University, Australia" | Viticulture and Enology Yeast Collection, UC Davis | reduced growth | Fluconazole | - |
| UCD1444 | <i>cerevisiae</i> | unknown     | "Culture obtained from Waite Institute, original # J3 (1947)" "Adelaide University, Australia"                  | Viticulture and Enology Yeast Collection, UC Davis |                |             |   |
| UCD1445 | <i>cerevisiae</i> | unknown     | "Adelaide University, Australia"                                                                                | Viticulture and Enology Yeast Collection, UC Davis |                |             |   |

|         |                    |             |                                                                                                                               |                                                    |                 |              |   |
|---------|--------------------|-------------|-------------------------------------------------------------------------------------------------------------------------------|----------------------------------------------------|-----------------|--------------|---|
| UCD1448 | <i>cerevisiae</i>  | unknown     | “Culture obtained from Waite Institute, original # J7B (1947)” “Adelaide University, Australia”                               | Viticulture and Enology Yeast Collection, UC Davis |                 |              |   |
| UCD153  | <i>sp.</i>         | wine        | wine                                                                                                                          | Viticulture and Enology Yeast Collection, UC Davis |                 |              |   |
| UCD155  | <i>sp.</i>         | wine        | wine<br>Fomachon to Mrak, 1956,<br>Possibly from Australia, isolate<br>was probably from<br>fermentation of wine or<br>bread? | Viticulture and Enology Yeast Collection, UC Davis |                 |              |   |
| UCD157  | <i>sp.</i>         | unknown     |                                                                                                                               | Viticulture and Enology Yeast Collection, UC Davis | reduced growth  | tBOOH        | - |
| UCD160  | <i>pastorianus</i> | wine        | wine, Region de Monbazillac                                                                                                   | Viticulture and Enology Yeast Collection, UC Davis | reduced growth  | YP-galactose | - |
| UCD167  | <i>cerevisiae</i>  | wine        | wine, Tripoli                                                                                                                 | Viticulture and Enology Yeast Collection, UC Davis | reduced growth  | tBOOH        | - |
| UCD168  | <i>cerevisiae</i>  | wine        | wine, Tripoli                                                                                                                 | Viticulture and Enology Yeast Collection, UC Davis |                 |              |   |
| UCD173  | <i>pastorianus</i> | grapes/must | Must, Western Sicily                                                                                                          | Viticulture and Enology Yeast Collection, UC Davis | improved growth | Hydroxyurea  | - |
| UCD174  | <i>pastorianus</i> | grapes/must | Must, Island of Pantelleria                                                                                                   | Viticulture and Enology Yeast Collection, UC Davis |                 |              |   |
| UCD175  | <i>cerevisiae</i>  | grapes/must | Must, Eastern Sicily (Etna)                                                                                                   | Viticulture and Enology Yeast Collection, UC Davis |                 |              |   |
| UCD176  | <i>cerevisiae</i>  | grapes/must | Must, Eastern Sicily (Etna)                                                                                                   | Viticulture and Enology Yeast Collection, UC Davis |                 |              |   |
| UCD2031 | <i>cerevisiae</i>  | wine        | commercial yeast                                                                                                              | Viticulture and Enology Yeast Collection, UC Davis |                 |              |   |
| UCD2032 | <i>cerevisiae</i>  | wine        | Commercial dry yeast                                                                                                          | Viticulture and Enology Yeast Collection, UC Davis |                 |              |   |

|         |                   |      |                             |                                                    |                       |             |   |  |
|---------|-------------------|------|-----------------------------|----------------------------------------------------|-----------------------|-------------|---|--|
| UCD2033 | <i>cerevisiae</i> | wine | Commercial dry yeast        | Viticulture and Enology Yeast Collection, UC Davis |                       |             |   |  |
| UCD2034 | <i>cerevisiae</i> | wine | Commercial yeast            | Viticulture and Enology Yeast Collection, UC Davis |                       |             |   |  |
| UCD2035 | <i>cerevisiae</i> | wine | Commercial dry wine yeast   | Viticulture and Enology Yeast Collection, UC Davis |                       |             |   |  |
| UCD2036 | <i>cerevisiae</i> | wine | Commercial dry wine yeast   | Viticulture and Enology Yeast Collection, UC Davis | [RNQ+] reduced growth | Ethanol     | - |  |
| UCD2038 | <i>cerevisiae</i> | wine | Commercial dry wine culture | Viticulture and Enology Yeast Collection, UC Davis |                       |             |   |  |
| UCD2039 | <i>cerevisiae</i> | wine | Commercial dry wine yeast   | Viticulture and Enology Yeast Collection, UC Davis |                       |             |   |  |
| UCD2061 | <i>cerevisiae</i> | wine | commercial dry wine yeast   | Viticulture and Enology Yeast Collection, UC Davis | reduced growth        | Fluconazole | - |  |
| UCD2068 | <i>cerevisiae</i> | wine | commercial dry wine yeast   | Viticulture and Enology Yeast Collection, UC Davis |                       |             |   |  |
| UCD2069 | <i>cerevisiae</i> | wine | commercial dry wine yeast   | Viticulture and Enology Yeast Collection, UC Davis |                       |             |   |  |
| UCD2070 | <i>cerevisiae</i> | wine | commercial dry wine yeast   | Viticulture and Enology Yeast Collection, UC Davis | improved growth       | Fluconazole | - |  |
| UCD2071 | <i>cerevisiae</i> | wine | commercial dry wine yeast   | Viticulture and Enology Yeast Collection, UC Davis |                       |             |   |  |
| UCD2073 | <i>cerevisiae</i> | wine | commercial dry wine yeast   | Viticulture and Enology Yeast Collection, UC Davis |                       |             |   |  |
| UCD2074 | <i>cerevisiae</i> | wine | commercial dry wine yeast   | Viticulture and Enology Yeast Collection, UC Davis |                       |             |   |  |
| UCD2086 | <i>sp.</i>        | wine | Stuck fermentation, wine    | Viticulture and Enology Yeast Collection, UC Davis | reduced growth        | YP-maltose  | - |  |
| UCD2087 | <i>sp.</i>        | wine | Stuck fermentation, wine    | Viticulture and Enology Yeast Collection, UC Davis |                       |             |   |  |
| UCD2088 | <i>sp.</i>        | wine | Stuck fermentation, wine    | Viticulture and Enology Yeast Collection, UC Davis |                       |             |   |  |

|         |                                |             |                           |                                                    |                 |       |   |
|---------|--------------------------------|-------------|---------------------------|----------------------------------------------------|-----------------|-------|---|
| UCD2089 | <i>sp.</i>                     | wine        | Stuck fermentation, wine  | Viticulture and Enology Yeast Collection, UC Davis |                 |       |   |
| UCD2090 | <i>sp.</i>                     | wine        | Stuck fermentation, wine  | Viticulture and Enology Yeast Collection, UC Davis |                 |       |   |
| UCD2099 | <i>cerevisiae race bayanus</i> | wine        | Commercial wine yeast     | Viticulture and Enology Yeast Collection, UC Davis |                 |       |   |
| UCD2103 | <i>cerevisiae</i>              | wine        | Barrel fermentation, Luna | Viticulture and Enology Yeast Collection, UC Davis |                 |       |   |
| UCD2118 | <i>cerevisiae</i>              | wine        | Barrel fermentation, Luna | Viticulture and Enology Yeast Collection, UC Davis |                 |       |   |
| UCD2120 | <i>cerevisiae</i>              | wine        | Wine, Barrel fermentation | Viticulture and Enology Yeast Collection, UC Davis |                 |       |   |
| UCD2121 | <i>cerevisiae</i>              | wine        | Barrel fermentation, Luna | Viticulture and Enology Yeast Collection, UC Davis |                 |       |   |
| UCD2122 | <i>cerevisiae</i>              | wine        | Barrel fermentation, Luna | Viticulture and Enology Yeast Collection, UC Davis |                 |       |   |
| UCD2176 | <i>cerevisiae</i>              | wine        | wine, barrel              | Viticulture and Enology Yeast Collection, UC Davis |                 |       |   |
| UCD2177 | <i>cerevisiae</i>              | wine        | wine, barrel              | Viticulture and Enology Yeast Collection, UC Davis |                 |       |   |
| UCD2199 | <i>cerevisiae</i>              | wine        | wine                      | Viticulture and Enology Yeast Collection, UC Davis |                 |       |   |
| UCD2201 | <i>cerevisiae</i>              | wine        | wine or must              | Viticulture and Enology Yeast Collection, UC Davis |                 |       |   |
| UCD2205 | <i>cerevisiae</i>              | wine        | wine or must              | Viticulture and Enology Yeast Collection, UC Davis |                 |       |   |
| UCD2206 | <i>cerevisiae</i>              | wine        | wine                      | Viticulture and Enology Yeast Collection, UC Davis | improved growth | 4-NQO | - |
| UCD2211 | <i>servazzii</i>               | grapes/must | must                      | Viticulture and Enology Yeast Collection, UC Davis | improved growth | 4-NQO | - |
| UCD2212 | <i>cerevisiae</i>              | wine        | commercial wine yeast     | Viticulture and Enology Yeast Collection, UC Davis |                 |       |   |

|         |                                |      |                           |                                                    |                 |             |   |  |
|---------|--------------------------------|------|---------------------------|----------------------------------------------------|-----------------|-------------|---|--|
| UCD2213 | <i>cerevisiae</i>              | wine | wine                      | Viticulture and Enology Yeast Collection, UC Davis |                 |             |   |  |
| UCD2214 | <i>cerevisiae</i>              | wine | commercial wine yeast     | Viticulture and Enology Yeast Collection, UC Davis | improved growth | 4-NQO       | - |  |
| UCD2215 | <i>cerevisiae</i>              | wine | commercial wine yeast     | Viticulture and Enology Yeast Collection, UC Davis | improved growth | 4-NQO       | - |  |
| UCD2216 | <i>cerevisiae</i>              | wine | commercial wine yeast     | Viticulture and Enology Yeast Collection, UC Davis | improved growth | 4-NQO       | - |  |
| UCD2389 | <i>cerevisiae</i>              | wine | Commercial dry wine yeast | Viticulture and Enology Yeast Collection, UC Davis | improved growth | 4-NQO       | - |  |
| UCD2390 | <i>cerevisiae</i>              | wine | commercial dry wine yeast | Viticulture and Enology Yeast Collection, UC Davis | improved growth | pH 4        | - |  |
| UCD2391 | <i>cerevisiae race bayanus</i> | wine | commercial dry wine yeast | Viticulture and Enology Yeast Collection, UC Davis | improved growth | 4-NQO       | - |  |
| UCD2392 | <i>cerevisiae</i>              | wine | commercial dry wine yeast | Viticulture and Enology Yeast Collection, UC Davis | improved growth | YP-maltose  | - |  |
| UCD2393 | <i>cerevisiae</i>              | wine | commercial dry wine yeast | Viticulture and Enology Yeast Collection, UC Davis | improved growth | 4-NQO       | - |  |
| UCD2394 | <i>cerevisiae race bayanus</i> | wine | commercial dry wine yeast | Viticulture and Enology Yeast Collection, UC Davis | improved growth | pH 4        | - |  |
| UCD2395 | <i>cerevisiae</i>              | wine | commercial dry wine yeast | Viticulture and Enology Yeast Collection, UC Davis | improved growth | Fluconazole | - |  |
| UCD2410 | <i>cerevisiae</i>              | wine | commercial dry wine yeast | Viticulture and Enology Yeast Collection, UC Davis | improved growth | Ethanol     | - |  |
| UCD2411 | <i>cerevisiae</i>              | wine | commercial dry wine yeast | Viticulture and Enology Yeast Collection, UC Davis | reduced growth  | Hydroxyurea | - |  |
| UCD2412 | <i>cerevisiae</i>              | wine | commercial dry wine yeast | Viticulture and Enology Yeast Collection, UC Davis | improved growth | YP-glycerol | - |  |

|         |                                       |      |                           |                                                    |                 |             |   |
|---------|---------------------------------------|------|---------------------------|----------------------------------------------------|-----------------|-------------|---|
| UCD2413 | <i>cerevisiae</i>                     | wine | commercial dry wine yeast | Viticulture and Enology Yeast Collection, UC Davis | improved growth | pH 4        | - |
| UCD2414 | <i>cerevisiae</i> race <i>bayanus</i> | wine | commercial dry wine yeast | Viticulture and Enology Yeast Collection, UC Davis | reduced growth  | Fluconazole | - |
| UCD2415 | <i>cerevisiae</i>                     | wine | commercial dry wine yeast | Viticulture and Enology Yeast Collection, UC Davis | improved growth | pH 4        | - |
| UCD2416 | <i>cerevisiae</i>                     | wine | commercial dry wine yeast | Viticulture and Enology Yeast Collection, UC Davis | improved growth |             |   |
| UCD2417 | <i>cerevisiae</i>                     | wine | commercial dry wine yeast | Viticulture and Enology Yeast Collection, UC Davis | improved growth | Fluconazole | - |
| UCD2454 | <i>cerevisiae</i>                     | beer | Beer                      | Viticulture and Enology Yeast Collection, UC Davis | improved growth | NaCl        | - |
| UCD2496 | <i>cerevisiae</i>                     | wine | Commercial dry wine Yeast | Viticulture and Enology Yeast Collection, UC Davis | reduced growth  | Ethanol     | - |
| UCD2497 | <i>cerevisiae</i>                     | wine | Commercial dry wine yeast | Viticulture and Enology Yeast Collection, UC Davis | improved growth | 4-NQO       | - |
| UCD2498 | <i>cerevisiae</i> var. <i>bayanus</i> | wine | commercial dry wine yeast | Viticulture and Enology Yeast Collection, UC Davis | improved growth | YP-maltose  | - |
| UCD2499 | <i>cerevisiae</i>                     | wine | commercial dry wine yeast | Viticulture and Enology Yeast Collection, UC Davis | improved growth | pH 4        | - |
| UCD2500 | <i>cerevisiae</i>                     | wine | commercial dry wine yeast | Viticulture and Enology Yeast Collection, UC Davis | reduced growth  | Ethanol     | - |
| UCD2501 | <i>cerevisiae</i>                     | wine | commercial dry wine yeast | Viticulture and Enology Yeast Collection, UC Davis | improved growth | Fluconazole | - |
|         |                                       |      |                           | Viticulture and Enology Yeast Collection, UC Davis | improved growth | 4-NQO       | - |

|         |                                          |      |                           |                                                    |  |                 |             |   |
|---------|------------------------------------------|------|---------------------------|----------------------------------------------------|--|-----------------|-------------|---|
|         |                                          |      |                           |                                                    |  | improved growth | Hydroxyurea | - |
|         |                                          |      |                           |                                                    |  | improved growth | YP-maltose  | - |
| UCD2502 | <i>cerevisiae</i>                        | wine | commercial dry wine yeast | Viticulture and Enology Yeast Collection, UC Davis |  | improved growth | 4-NQO       | - |
|         |                                          |      |                           |                                                    |  | improved growth | YP-maltose  | - |
| UCD2521 | <i>cerevisiae</i>                        | wine | commercial dry wine yeast | Viticulture and Enology Yeast Collection, UC Davis |  |                 |             |   |
| UCD2522 | <i>cerevisiae</i>                        | wine | commercial dry wine yeast | Viticulture and Enology Yeast Collection, UC Davis |  | improved growth | Fluconazole | - |
| UCD2523 | <i>cerevisiae</i>                        | wine | commercial dry wine yeast | Viticulture and Enology Yeast Collection, UC Davis |  | improved growth | Fluconazole | - |
| UCD2524 | <i>cerevisiae</i>                        | wine | commercial dry wine yeast | Viticulture and Enology Yeast Collection, UC Davis |  |                 |             |   |
| UCD2525 | <i>cerevisiae</i>                        | wine | commercial dry wine yeast | Viticulture and Enology Yeast Collection, UC Davis |  |                 |             |   |
| UCD2526 | <i>cerevisiae</i>                        | wine | commercial dry wine yeast | Viticulture and Enology Yeast Collection, UC Davis |  |                 |             |   |
| UCD2527 | <i>cerevisiae</i>                        | wine | commercial dry wine yeast | Viticulture and Enology Yeast Collection, UC Davis |  | reduced growth  | tBOOH       | - |
|         |                                          |      |                           |                                                    |  | improved growth | YP-maltose  | - |
| UCD2528 | <i>cerevisiae</i>                        | wine | commercial dry wine yeast | Viticulture and Enology Yeast Collection, UC Davis |  | improved growth | Fluconazole | - |
| UCD2529 | <i>cerevisiae</i>                        | wine | commercial dry wine yeast | Viticulture and Enology Yeast Collection, UC Davis |  | improved growth | YP-maltose  | - |
| UCD2530 | <i>cerevisiae</i> race<br><i>bayanus</i> | wine | commercial dry wine yeast | Viticulture and Enology Yeast Collection, UC Davis |  | improved growth | 4-NQO       | - |
|         |                                          |      |                           |                                                    |  | improved growth | pH 4        | - |

|         |                   |      |                           |                                                    |                        |              |   |
|---------|-------------------|------|---------------------------|----------------------------------------------------|------------------------|--------------|---|
| UCD2531 | <i>cerevisiae</i> | wine | commercial dry wine yeast | Viticulture and Enology Yeast Collection, UC Davis | improved growth        | Fluconazole  | - |
| UCD2532 | <i>cerevisiae</i> | wine | commercial dry wine yeast | Viticulture and Enology Yeast Collection, UC Davis | improved growth        | 4-NQO        | - |
|         |                   |      |                           |                                                    | improved growth        | Fluconazole  | - |
|         |                   |      |                           |                                                    | improved growth        | YP-galactose | - |
| UCD2533 | <i>cerevisiae</i> | wine | commercial dry wine yeast | Viticulture and Enology Yeast Collection, UC Davis | improved growth        | Fluconazole  | - |
| UCD2534 | <i>cerevisiae</i> | wine | commercial dry wine yeast | Viticulture and Enology Yeast Collection, UC Davis | [RNQ+] improved growth | pH 4         | - |
| UCD2535 | <i>cerevisiae</i> | wine | commercial dry wine yeast | Viticulture and Enology Yeast Collection, UC Davis | [PSI+] improved growth | Ethanol      | - |
|         |                   |      |                           |                                                    | improved growth        | Fluconazole  | - |
|         |                   |      |                           |                                                    | improved growth        | Hydroxyurea  | - |
|         |                   |      |                           |                                                    | improved growth        | pH 4         | - |
| UCD2536 | <i>cerevisiae</i> | wine | commercial dry wine yeast | Viticulture and Enology Yeast Collection, UC Davis | improved growth        | 4-NQO        | - |
|         |                   |      |                           |                                                    | improved growth        | NaCl         | - |
| UCD2537 | <i>cerevisiae</i> | wine | commercial dry wine yeast | Viticulture and Enology Yeast Collection, UC Davis | improved growth        | 4-NQO        | - |
| UCD2538 | <i>cerevisiae</i> | wine | commercial dry wine yeast | Viticulture and Enology Yeast Collection, UC Davis | improved growth        | 4-NQO        | - |
| UCD2539 | <i>cerevisiae</i> | wine | commercial dry wine yeast | Viticulture and Enology Yeast Collection, UC Davis |                        |              |   |
| UCD2540 | <i>cerevisiae</i> | wine | commercial dry wine yeast | Viticulture and Enology Yeast Collection, UC Davis |                        |              |   |



|         |                   |      |                           |                                                    |                 |             |   |  |
|---------|-------------------|------|---------------------------|----------------------------------------------------|-----------------|-------------|---|--|
| UCD2541 | <i>cerevisiae</i> | wine | commercial dry wine yeast | Viticulture and Enology Yeast Collection, UC Davis |                 |             |   |  |
| UCD2542 | <i>cerevisiae</i> | wine | commercial dry wine yeast | Viticulture and Enology Yeast Collection, UC Davis |                 |             |   |  |
| UCD2543 | <i>cerevisiae</i> | wine | commercial dry wine yeast | Viticulture and Enology Yeast Collection, UC Davis | reduced growth  | NaCl        | - |  |
|         |                   |      |                           |                                                    | improved growth | 4-NQO       | - |  |
| UCD2544 | <i>cerevisiae</i> | wine | commercial dry wine yeast | Viticulture and Enology Yeast Collection, UC Davis | reduced growth  | NaCl        | - |  |
|         |                   |      |                           |                                                    | improved growth | Ethanol     | - |  |
|         |                   |      |                           |                                                    | improved growth | YP-maltose  | - |  |
| UCD2545 | <i>cerevisiae</i> | wine | commercial dry wine yeast | Viticulture and Enology Yeast Collection, UC Davis | reduced growth  | Hydroxyurea | - |  |
|         |                   |      |                           |                                                    | improved growth | Fluconazole | - |  |
| UCD2546 | <i>cerevisiae</i> | wine | commercial dry wine yeast | Viticulture and Enology Yeast Collection, UC Davis | reduced growth  | Ethanol     | - |  |
|         |                   |      |                           |                                                    | improved growth | YP-maltose  | - |  |
| UCD2547 | <i>cerevisiae</i> | wine | Wine Spain                | Viticulture and Enology Yeast Collection, UC Davis |                 |             |   |  |
| UCD2553 | <i>cerevisiae</i> | wine | commercial dry wine yeast | Viticulture and Enology Yeast Collection, UC Davis | reduced growth  | Hydroxyurea | - |  |
|         |                   |      |                           |                                                    | reduced growth  | NaCl        | - |  |
|         |                   |      |                           |                                                    | improved growth | Fluconazole | - |  |
| UCD2554 | <i>cerevisiae</i> | wine | commercial dry wine yeast | Viticulture and Enology Yeast Collection, UC Davis |                 |             |   |  |

|         |                   |       |                                                                       |                                                    |                 |              |   |
|---------|-------------------|-------|-----------------------------------------------------------------------|----------------------------------------------------|-----------------|--------------|---|
| UCD2555 | <i>cerevisiae</i> | wine  | commercial dry wine yeast                                             | Viticulture and Enology Yeast Collection, UC Davis | improved growth | 4-NQO        | - |
|         |                   |       |                                                                       |                                                    | improved growth | NaCl         | - |
| UCD2607 | <i>cerevisiae</i> | fruit | Figs, Merced California, fermenting                                   | Viticulture and Enology Yeast Collection, UC Davis |                 |              |   |
| UCD2608 | <i>cerevisiae</i> | wine  | commercial dry wine yeast                                             | Viticulture and Enology Yeast Collection, UC Davis |                 |              |   |
| UCD2609 | <i>cerevisiae</i> | wine  | commercial dry wine yeast                                             | Viticulture and Enology Yeast Collection, UC Davis | improved growth | Fluconazole  | - |
| UCD2610 | <i>cerevisiae</i> | wine  | commercial dry wine yeast                                             | Viticulture and Enology Yeast Collection, UC Davis | improved growth | Fluconazole  | - |
|         |                   |       |                                                                       |                                                    | improved growth | YP-maltose   | - |
| UCD2611 | <i>cerevisiae</i> | wine  | commercial dry wine yeast                                             | Viticulture and Enology Yeast Collection, UC Davis | reduced growth  | NaCl         | - |
|         |                   |       |                                                                       |                                                    | improved growth | Fluconazole  | - |
| UCD2614 | <i>cerevisiae</i> | wine  | wine, 2006 California Chardonnay, 2007, Napa Valley, California, wine | Viticulture and Enology Yeast Collection, UC Davis | improved growth | Hydroxyurea  | - |
| UCD2616 | <i>cerevisiae</i> | wine  |                                                                       | Viticulture and Enology Yeast Collection, UC Davis | improved growth | YP-galactose | - |
| UCD2617 | <i>cerevisiae</i> | wine  | Wine                                                                  | Viticulture and Enology Yeast Collection, UC Davis | improved growth | Fluconazole  | - |
|         |                   |       |                                                                       |                                                    | improved growth | tBOOH        | - |
| UCD27   | <i>sp.</i>        | wine  | wine                                                                  | Viticulture and Enology Yeast Collection, UC Davis |                 |              |   |
| UCD2747 | <i>sp</i>         | wine  | Commercial yeast, Anchor                                              | Viticulture and Enology Yeast Collection, UC Davis | improved growth | Fluconazole  | - |
| UCD2756 | <i>cerevisiae</i> | wine  | Commercial wine yeast                                                 | Viticulture and Enology Yeast Collection, UC Davis |                 |              |   |

|         |                   |         |                     |                                                    |                 |             |   |  |
|---------|-------------------|---------|---------------------|----------------------------------------------------|-----------------|-------------|---|--|
| UCD2773 | <i>cerevisiae</i> | unknown | Commercial yeast    | Viticulture and Enology Yeast Collection, UC Davis |                 |             |   |  |
| UCD2774 | <i>cerevisiae</i> | unknown | Commercial yeast    | Viticulture and Enology Yeast Collection, UC Davis | reduced growth  | tBOOH       | - |  |
| UCD2775 | <i>cerevisiae</i> | wine    | Wine yeast          | Viticulture and Enology Yeast Collection, UC Davis | reduced growth  | pH 4        | - |  |
| UCD2778 | <i>cerevisiae</i> | wine    | wine yeast          | Viticulture and Enology Yeast Collection, UC Davis |                 |             |   |  |
| UCD2779 | <i>cerevisiae</i> | wine    | Wine yeast          | Viticulture and Enology Yeast Collection, UC Davis |                 |             |   |  |
| UCD2780 | <i>cerevisiae</i> | wine    | Wine yeast          | Viticulture and Enology Yeast Collection, UC Davis | reduced growth  | pH 9        | - |  |
| UCD2781 | <i>cerevisiae</i> | wine    | Wine yeast          | Viticulture and Enology Yeast Collection, UC Davis | improved growth | Fluconazole | - |  |
| UCD2782 | <i>cerevisiae</i> | wine    | Wine yeast          | Viticulture and Enology Yeast Collection, UC Davis | improved growth | Ethanol     | - |  |
|         |                   |         |                     |                                                    | improved growth | Fluconazole | - |  |
|         |                   |         |                     |                                                    | improved growth | YP-glycerol | - |  |
| UCD2783 | <i>cerevisiae</i> | wine    | Wine yeast          | Viticulture and Enology Yeast Collection, UC Davis | improved growth | Fluconazole | - |  |
| UCD447  | <i>cerevisiae</i> | unknown | Mrak 1948           | Viticulture and Enology Yeast Collection, UC Davis |                 |             |   |  |
| UCD49   | <i>cerevisiae</i> | fruit   | citrus fermentation | Viticulture and Enology Yeast Collection, UC Davis |                 |             |   |  |
| UCD501  | <i>cerevisiae</i> | wine    | Wine                | Viticulture and Enology Yeast Collection, UC Davis |                 |             |   |  |
| UCD502  | <i>cerevisiae</i> | wine    | wine                | Viticulture and Enology Yeast Collection, UC Davis | reduced growth  | Hydroxyurea | - |  |
| UCD503  | <i>cerevisiae</i> | wine    | champagne, wine     | Viticulture and Enology Yeast Collection, UC Davis |                 |             |   |  |

|        |                   |            |                       |                                                    |                       |             |   |
|--------|-------------------|------------|-----------------------|----------------------------------------------------|-----------------------|-------------|---|
| UCD505 | <i>cerevisiae</i> | wine       | wine                  | Viticulture and Enology Yeast Collection, UC Davis |                       |             |   |
| UCD506 | <i>cerevisiae</i> | wine       | wine                  | Viticulture and Enology Yeast Collection, UC Davis |                       |             |   |
| UCD507 | <i>cerevisiae</i> | wine       | wine                  | Viticulture and Enology Yeast Collection, UC Davis |                       |             |   |
| UCD509 | <i>cerevisiae</i> | wine       | wine                  | Viticulture and Enology Yeast Collection, UC Davis |                       |             |   |
| UCD51  | <i>cerevisiae</i> | wine       | wine                  | Viticulture and Enology Yeast Collection, UC Davis |                       |             |   |
| UCD510 | <i>cerevisiae</i> | wine       | wine                  | Viticulture and Enology Yeast Collection, UC Davis |                       |             |   |
| UCD511 |                   | 0 wine     | wine, Champagne, 1958 | Viticulture and Enology Yeast Collection, UC Davis | reduced growth        | Hydroxyurea | - |
| UCD512 | <i>cerevisiae</i> | wine       | cognac, ferm          | Viticulture and Enology Yeast Collection, UC Davis |                       |             |   |
| UCD513 | <i>cerevisiae</i> | distilling | fermentation          | Viticulture and Enology Yeast Collection, UC Davis |                       |             |   |
| UCD514 | <i>cerevisiae</i> | wine       | wine                  | Viticulture and Enology Yeast Collection, UC Davis |                       |             |   |
| UCD515 | <i>cerevisiae</i> | wine       | Wine                  | Viticulture and Enology Yeast Collection, UC Davis | reduced growth        | Hydroxyurea | - |
| UCD517 | <i>cerevisiae</i> | wine       | Wine                  | Viticulture and Enology Yeast Collection, UC Davis | reduced growth        | Hydroxyurea | - |
| UCD518 | <i>cerevisiae</i> | wine       | Wine                  | Viticulture and Enology Yeast Collection, UC Davis | reduced growth        | Hydroxyurea | - |
| UCD519 | <i>cerevisiae</i> | wine       | Sherry wine           | Viticulture and Enology Yeast Collection, UC Davis |                       |             |   |
| UCD520 | <i>cerevisiae</i> | wine       | Malaga wine           | Viticulture and Enology Yeast Collection, UC Davis | reduced growth        | Hydroxyurea | - |
| UCD521 | <i>cerevisiae</i> | wine       | Marsala wine          | Viticulture and Enology Yeast Collection, UC Davis | [RNQ+] reduced growth | Hydroxyurea | - |

|        |                   |      |                 |                                                    |                 |             |   |
|--------|-------------------|------|-----------------|----------------------------------------------------|-----------------|-------------|---|
| UCD522 | <i>cerevisiae</i> | wine | Montrachet wine | Viticulture and Enology Yeast Collection, UC Davis | reduced growth  | Hydroxyurea | - |
| UCD523 | <i>cerevisiae</i> | wine | Moselle wine    | Viticulture and Enology Yeast Collection, UC Davis |                 |             |   |
| UCD524 | <i>cerevisiae</i> | wine | Muscatel wine   | Viticulture and Enology Yeast Collection, UC Davis | improved growth | YP-glycerol | - |
| UCD525 | <i>cerevisiae</i> | wine | Port wine       | Viticulture and Enology Yeast Collection, UC Davis |                 |             |   |
| UCD526 | <i>cerevisiae</i> | wine | wine, Rhine     | Viticulture and Enology Yeast Collection, UC Davis |                 |             |   |
| UCD527 | <i>cerevisiae</i> | wine | Riesling wine   | Viticulture and Enology Yeast Collection, UC Davis | improved growth | Fluconazole | - |
|        |                   |      |                 |                                                    | improved growth | Hydroxyurea | - |
| UCD529 | <i>cerevisiae</i> | wine | Wine            | Viticulture and Enology Yeast Collection, UC Davis | improved growth | Fluconazole | - |
| UCD530 | <i>cerevisiae</i> | wine | Wine, Tokay     | Viticulture and Enology Yeast Collection, UC Davis |                 |             |   |
| UCD532 | <i>cerevisiae</i> | wine | Wine yeast      | Viticulture and Enology Yeast Collection, UC Davis |                 |             |   |
| UCD533 | <i>cerevisiae</i> | wine | Wine            | Viticulture and Enology Yeast Collection, UC Davis |                 |             |   |
| UCD535 | <i>cerevisiae</i> | wine | wine            | Viticulture and Enology Yeast Collection, UC Davis |                 |             |   |
| UCD538 | <i>cerevisiae</i> | wine | Bourgogne wine  | Viticulture and Enology Yeast Collection, UC Davis |                 |             |   |
| UCD539 | <i>cerevisiae</i> | wine | Wine            | Viticulture and Enology Yeast Collection, UC Davis |                 |             |   |
| UCD541 | <i>cerevisiae</i> | wine | Wine            | Viticulture and Enology Yeast Collection, UC Davis |                 |             |   |
| UCD542 | <i>cerevisiae</i> | wine | wine            | Viticulture and Enology Yeast Collection, UC Davis | reduced growth  | Hydroxyurea | - |

|        |                   |      |                |                                                    |                                   |                     |        |
|--------|-------------------|------|----------------|----------------------------------------------------|-----------------------------------|---------------------|--------|
|        |                   |      |                |                                                    | reduced growth                    | YP-maltose          | -      |
| UCD544 | <i>cerevisiae</i> | wine | wine           | Viticulture and Enology Yeast Collection, UC Davis |                                   |                     |        |
| UCD545 | <i>cerevisiae</i> | wine | Sauternes wine | Viticulture and Enology Yeast Collection, UC Davis |                                   |                     |        |
| UCD546 | <i>cerevisiae</i> | wine | Wine           | Viticulture and Enology Yeast Collection, UC Davis |                                   |                     |        |
| UCD547 | <i>cerevisiae</i> | beer | Beer           | Viticulture and Enology Yeast Collection, UC Davis |                                   |                     |        |
| UCD550 | <i>cerevisiae</i> | wine | wine?          | Viticulture and Enology Yeast Collection, UC Davis |                                   |                     |        |
| UCD552 | <i>cerevisiae</i> | wine | Sherry wine    | Viticulture and Enology Yeast Collection, UC Davis | reduced growth                    | Hydroxyurea         | -      |
| UCD553 | <i>cerevisiae</i> | wine | Sherry wine    | Viticulture and Enology Yeast Collection, UC Davis |                                   |                     |        |
| UCD554 | <i>cerevisiae</i> | wine | Sherry wine    | Viticulture and Enology Yeast Collection, UC Davis |                                   |                     |        |
| UCD555 | <i>cerevisiae</i> | wine | Sherry wine    | Viticulture and Enology Yeast Collection, UC Davis | reduced growth<br>improved growth | Hydroxyurea<br>pH 4 | -<br>- |
| UCD556 | <i>cerevisiae</i> | wine | Sherry wine    | Viticulture and Enology Yeast Collection, UC Davis |                                   |                     |        |
| UCD557 | <i>cerevisiae</i> | wine | Sherry wine    | Viticulture and Enology Yeast Collection, UC Davis |                                   |                     |        |
| UCD558 | <i>cerevisiae</i> | wine | Sherry wine    | Viticulture and Enology Yeast Collection, UC Davis |                                   |                     |        |
| UCD561 | <i>cerevisiae</i> | wine | Sherry wine    | Viticulture and Enology Yeast Collection, UC Davis |                                   |                     |        |
| UCD562 | <i>cerevisiae</i> | wine | Sherry wine    | Viticulture and Enology Yeast Collection, UC Davis |                                   |                     |        |

|        |                   |      |                           |                                                    |                 |             |   |
|--------|-------------------|------|---------------------------|----------------------------------------------------|-----------------|-------------|---|
| UCD563 | <i>cerevisiae</i> | wine | Sherry wine               | Viticulture and Enology Yeast Collection, UC Davis |                 |             |   |
| UCD565 | <i>cerevisiae</i> | wine | Sherry wine               | Viticulture and Enology Yeast Collection, UC Davis |                 |             |   |
| UCD567 | <i>cerevisiae</i> | wine | Sherry wine               | Viticulture and Enology Yeast Collection, UC Davis |                 |             |   |
| UCD568 | <i>cerevisiae</i> | wine | Sherry wine               | Viticulture and Enology Yeast Collection, UC Davis |                 |             |   |
| UCD569 | <i>cerevisiae</i> | wine | Sherry wine               | Viticulture and Enology Yeast Collection, UC Davis |                 |             |   |
| UCD571 | <i>cerevisiae</i> | wine | Sherry wine               | Viticulture and Enology Yeast Collection, UC Davis | reduced growth  | Hydroxyurea | - |
|        |                   |      |                           |                                                    | reduced growth  | pH 4        | - |
| UCD574 | <i>cerevisiae</i> | wine | wine                      | Viticulture and Enology Yeast Collection, UC Davis | reduced growth  | Hydroxyurea | - |
| UCD575 | <i>cerevisiae</i> | wine | Sylvaner wine             | Viticulture and Enology Yeast Collection, UC Davis | reduced growth  | pH 9        | - |
|        |                   |      |                           |                                                    | improved growth | Ethanol     | - |
| UCD577 | <i>cerevisiae</i> | wine | Muscat wine               | Viticulture and Enology Yeast Collection, UC Davis |                 |             |   |
| UCD578 | <i>cerevisiae</i> | wine | Gewurtraminer wine        | Viticulture and Enology Yeast Collection, UC Davis |                 |             |   |
| UCD579 | <i>cerevisiae</i> | wine | commercial dry wine yeast | Viticulture and Enology Yeast Collection, UC Davis |                 |             |   |
| UCD580 | <i>sp</i>         | wine | Flor Yeast, Sherry wine   | Viticulture and Enology Yeast Collection, UC Davis |                 |             |   |
| UCD586 | <i>cerevisiae</i> | wine | wine                      | Viticulture and Enology Yeast Collection, UC Davis | improved growth | YP-maltose  | - |

|        |                                                                                                                         |             |                           |                                                       |                  |                                          |                      |            |
|--------|-------------------------------------------------------------------------------------------------------------------------|-------------|---------------------------|-------------------------------------------------------|------------------|------------------------------------------|----------------------|------------|
| UCD587 | <i>cerevisiae</i><br>(determined by<br>ITS1 sequencing<br>in our lab;<br>originally<br>annotated as<br><i>bayanus</i> ) | grapes/must | Must Semillon             | Viticulture and Enology Yeast<br>Collection, UC Davis | [RNQ+]<br>[PSI+] | improved<br>growth<br>improved<br>growth | 4-NQO<br><br>Ethanol | -<br><br>- |
| UCD588 | <i>cerevisiae</i>                                                                                                       | wine        | Wine                      | Viticulture and Enology Yeast<br>Collection, UC Davis |                  |                                          |                      |            |
| UCD591 | <i>cerevisiae</i>                                                                                                       | wine        | wine, German              | Viticulture and Enology Yeast<br>Collection, UC Davis |                  | reduced<br>growth                        | NaCl                 | -          |
| UCD594 | <i>cerevisiae</i> race<br><i>bayanus</i>                                                                                | wine        | Champagne wine, France    | Viticulture and Enology Yeast<br>Collection, UC Davis |                  |                                          |                      |            |
| UCD595 | <i>cerevisiae</i>                                                                                                       | wine        | commercial dry wine yeast | Viticulture and Enology Yeast<br>Collection, UC Davis |                  |                                          |                      |            |
| UCD603 | <i>cerevisiae</i>                                                                                                       | wine        | Wine                      | Viticulture and Enology Yeast<br>Collection, UC Davis |                  |                                          |                      |            |
| UCD604 | <i>cerevisiae</i>                                                                                                       | wine        | Wine                      | Viticulture and Enology Yeast<br>Collection, UC Davis |                  |                                          |                      |            |
| UCD609 | <i>cerevisiae</i> race<br><i>bayanus</i>                                                                                | wine        | wine                      | Viticulture and Enology Yeast<br>Collection, UC Davis |                  |                                          |                      |            |
| UCD610 | <i>sp.</i>                                                                                                              | wine        | wine                      | Viticulture and Enology Yeast<br>Collection, UC Davis |                  | improved<br>growth                       | pH 4                 | -          |
| UCD611 | <i>cerevisiae</i>                                                                                                       | sake        | Sake, rice wine           | Viticulture and Enology Yeast<br>Collection, UC Davis |                  | improved<br>growth                       | 4-NQO                | -          |
| UCD612 | <i>cerevisiae</i>                                                                                                       | sake        | Sake, rice wine           | Viticulture and Enology Yeast<br>Collection, UC Davis |                  |                                          |                      |            |
| UCD613 | <i>cerevisiae</i>                                                                                                       | sake        | Sake, rice wine           | Viticulture and Enology Yeast<br>Collection, UC Davis |                  | reduced<br>growth<br>improved<br>growth  | NaCl<br><br>4-NQO    | -<br><br>- |



|        |                   |             |                        |                                                    |        |                 |            |   |
|--------|-------------------|-------------|------------------------|----------------------------------------------------|--------|-----------------|------------|---|
|        |                   |             |                        |                                                    |        | improved growth | YP-maltose | - |
| UCD619 | <i>cerevisiae</i> | wine        | Wine fermentation      | Viticulture and Enology Yeast Collection, UC Davis |        |                 |            |   |
| UCD620 | <i>cerevisiae</i> | wine        | wine fermentation      | Viticulture and Enology Yeast Collection, UC Davis |        |                 |            |   |
| UCD621 | <i>cerevisiae</i> | wine        | wine fermentation      | Viticulture and Enology Yeast Collection, UC Davis | [RNQ+] | reduced growth  | 4-NQO      | - |
| UCD622 | <i>cerevisiae</i> | wine        | wine fermentation      | Viticulture and Enology Yeast Collection, UC Davis |        |                 |            |   |
| UCD623 | <i>cerevisiae</i> | wine        | wine fermentation      | Viticulture and Enology Yeast Collection, UC Davis |        |                 |            |   |
| UCD624 | <i>cerevisiae</i> | wine        | wine fermentation      | Viticulture and Enology Yeast Collection, UC Davis |        |                 |            |   |
| UCD628 | <i>kluyveri</i>   | wine        | wine fermentation      | Viticulture and Enology Yeast Collection, UC Davis |        |                 |            |   |
| UCD629 | <i>cerevisiae</i> | wine        | wine fermentation      | Viticulture and Enology Yeast Collection, UC Davis | [RNQ+] |                 |            |   |
| UCD632 | <i>cerevisiae</i> | grapes/must | must                   | Viticulture and Enology Yeast Collection, UC Davis |        |                 |            |   |
| UCD634 | <i>cerevisiae</i> | wine        | wine fermentation      | Viticulture and Enology Yeast Collection, UC Davis |        |                 |            |   |
| UCD640 | <i>cerevisiae</i> | wine        | wine fermentation      | Viticulture and Enology Yeast Collection, UC Davis |        |                 |            |   |
| UCD647 | <i>cerevisiae</i> | grapes/must | must                   | Viticulture and Enology Yeast Collection, UC Davis |        |                 |            |   |
| UCD650 | <i>cerevisiae</i> | wine        | wine fermentation      | Viticulture and Enology Yeast Collection, UC Davis |        |                 |            |   |
| UCD653 | <i>cerevisiae</i> | wine        | commercial wine strain | Viticulture and Enology Yeast Collection, UC Davis |        | improved growth | YP-maltose | - |
| UCD656 | <i>cerevisiae</i> | sake        | Sake, rice wine        | Viticulture and Enology Yeast Collection, UC Davis |        |                 |            |   |

|        |                                   |        |                           |                                                    |        |                 |             |   |
|--------|-----------------------------------|--------|---------------------------|----------------------------------------------------|--------|-----------------|-------------|---|
| UCD658 | <i>sp.</i>                        | wine   | wine, champagne           | Viticulture and Enology Yeast Collection, UC Davis |        | reduced growth  | Fluconazole | - |
|        |                                   |        |                           |                                                    |        | reduced growth  | pH 9        | - |
| UCD659 | <i>sp.</i>                        | wine   | wine, champagne           | Viticulture and Enology Yeast Collection, UC Davis |        |                 |             |   |
| UCD660 | <i>cerevisiae cerevisiae race</i> | baking | commercial bread yeast    | Viticulture and Enology Yeast Collection, UC Davis | [RNQ+] |                 |             |   |
| UCD661 | <i>bayanus cerevisiae race</i>    | wine   | wine, champagne           | Viticulture and Enology Yeast Collection, UC Davis |        |                 |             |   |
| UCD662 | <i>bayanus</i>                    | wine   | wine, champagne           | Viticulture and Enology Yeast Collection, UC Davis |        |                 |             |   |
| UCD664 | <i>uvarum</i>                     | fruit  | apple cider, fermentation | Viticulture and Enology Yeast Collection, UC Davis | [RNQ+] |                 |             |   |
| UCD667 | <i>sp.</i>                        | baking | commercial bread yeast    | Viticulture and Enology Yeast Collection, UC Davis |        | improved growth | Fluconazole | - |
|        |                                   |        |                           |                                                    |        | improved growth | YP-maltose  | - |
| UCD668 | <i>sp.</i>                        | baking | commercial bread yeast    | Viticulture and Enology Yeast Collection, UC Davis |        |                 |             |   |
| UCD669 | <i>sp.</i>                        | baking | commercial bread yeast    | Viticulture and Enology Yeast Collection, UC Davis |        | improved growth | Fluconazole | - |
| UCD670 | <i>sp.</i>                        | baking | commercial bread yeast    | Viticulture and Enology Yeast Collection, UC Davis |        | reduced growth  | Ethanol     | - |
| UCD671 | <i>sp.</i>                        | baking | commercial bread yeast    | Viticulture and Enology Yeast Collection, UC Davis | [RNQ+] | reduced growth  | Ethanol     | - |
| UCD672 | <i>sp.</i>                        | baking | commercial bread yeast    | Viticulture and Enology Yeast Collection, UC Davis | [RNQ+] |                 |             |   |
| UCD673 | <i>sp.</i>                        | baking | commercial bread yeast    | Viticulture and Enology Yeast Collection, UC Davis |        |                 |             |   |
| UCD674 | <i>sp.</i>                        | baking | commercial bread yeast    | Viticulture and Enology Yeast Collection, UC Davis |        |                 |             |   |

|        |                             |             |                                         |                                                    |                 |              |   |  |
|--------|-----------------------------|-------------|-----------------------------------------|----------------------------------------------------|-----------------|--------------|---|--|
| UCD675 | <i>sp.</i>                  | baking      | Commercial bread yeast                  | Viticulture and Enology Yeast Collection, UC Davis |                 |              |   |  |
| UCD676 | <i>sp.</i>                  | baking      | Commercial dry bread yeast              | Viticulture and Enology Yeast Collection, UC Davis | improved growth | pH 9         | - |  |
| UCD677 | <i>sp.</i>                  | baking      | commercial dry bread yeast              | Viticulture and Enology Yeast Collection, UC Davis | improved growth | tBOOH        | - |  |
| UCD679 | <i>cerevisiae</i>           | wine        | commercial wine yeast                   | Viticulture and Enology Yeast Collection, UC Davis | reduced growth  |              |   |  |
| UCD680 | <i>cerevisiae</i>           | wine        | commercial wine yeast                   | Viticulture and Enology Yeast Collection, UC Davis | improved growth | 4-NQO        | - |  |
| UCD681 | <i>sp.</i>                  | wine        | wine                                    | Viticulture and Enology Yeast Collection, UC Davis | improved growth | NaCl         | - |  |
| UCD682 | <i>bayanus/pastori anus</i> | wine        | wine                                    | Viticulture and Enology Yeast Collection, UC Davis |                 |              |   |  |
| UCD684 | <i>bayanus/pastori anus</i> | wine        | wine                                    | Viticulture and Enology Yeast Collection, UC Davis |                 |              |   |  |
| UCD685 | <i>bayanus</i>              | wine        | wine                                    | Viticulture and Enology Yeast Collection, UC Davis | reduced growth  | NaCl         | - |  |
|        |                             |             |                                         |                                                    | reduced growth  |              |   |  |
|        |                             |             |                                         |                                                    | reduced growth  | pH 4         | - |  |
|        |                             |             |                                         |                                                    | reduced growth  | YP-galactose | - |  |
|        |                             |             |                                         |                                                    | reduced growth  | YP-glycerol  | - |  |
|        |                             |             |                                         |                                                    | improved growth | Ethanol      | - |  |
|        |                             |             |                                         |                                                    | improved growth | YP-maltose   | - |  |
| UCD690 |                             | 0 wine      | Wine, 1979, un inoculated UC Davis wine | Viticulture and Enology Yeast Collection, UC Davis |                 |              |   |  |
| UCD701 | <i>cerevisiae</i>           | grapes/must | Grapes, California                      | Viticulture and Enology Yeast Collection, UC Davis |                 |              |   |  |

|        |                   |        |                                                                        |                                                    |                 |             |   |
|--------|-------------------|--------|------------------------------------------------------------------------|----------------------------------------------------|-----------------|-------------|---|
| UCD702 | <i>sp.</i>        | wine   | wine, champagne                                                        | Viticulture and Enology Yeast Collection, UC Davis | reduced growth  | Hydroxyurea | - |
| UCD705 | <i>cerevisiae</i> | beer   | Beer, Germany                                                          | Viticulture and Enology Yeast Collection, UC Davis |                 |             |   |
| UCD706 | <i>cerevisiae</i> | wine   | wine, Gamay                                                            | Viticulture and Enology Yeast Collection, UC Davis |                 |             |   |
| UCD712 | <i>cerevisiae</i> | wine   | commercial wine yeast                                                  | Viticulture and Enology Yeast Collection, UC Davis | improved growth | tBOOH       | - |
| UCD713 | <i>cerevisiae</i> | wine   | commercial wine yeast                                                  | Viticulture and Enology Yeast Collection, UC Davis |                 |             |   |
| UCD715 | <i>sp.</i>        | wine   | commercial wine yeast                                                  | Viticulture and Enology Yeast Collection, UC Davis | improved growth | 4-NQO       | - |
|        |                   |        |                                                                        |                                                    | improved growth | NaCl        | - |
|        |                   |        |                                                                        |                                                    | improved growth | pH 4        | - |
| UCD723 |                   | 0 wine | Wine, Sauvignon Blanc, 1980                                            | Viticulture and Enology Yeast Collection, UC Davis |                 |             |   |
| UCD724 |                   | 0 wine | Wine, Pinot Blanc, 1980                                                | Viticulture and Enology Yeast Collection, UC Davis |                 |             |   |
| UCD725 | <i>sp.</i>        | wine   | commercial wine strain                                                 | Viticulture and Enology Yeast Collection, UC Davis |                 |             |   |
| UCD726 | <i>cerevisiae</i> | wine   | wine                                                                   | Viticulture and Enology Yeast Collection, UC Davis |                 |             |   |
| UCD750 | <i>cerevisiae</i> | wine   | commercial wine yeast                                                  | Viticulture and Enology Yeast Collection, UC Davis |                 |             |   |
| UCD753 | <i>cerevisiae</i> | wine   | wine, German? (C.S.O.-Centro Servizi Ortofrutticoli-Soc. Coop., Italy) | Viticulture and Enology Yeast Collection, UC Davis | [RNQ+]          |             |   |
| UCD754 | <i>cerevisiae</i> | wine   | wine, German? (C.S.O.-Centro Servizi Ortofrutticoli-Soc. Coop., Italy) | Viticulture and Enology Yeast Collection, UC Davis | improved growth | Hydroxyurea | - |
|        |                   |        |                                                                        |                                                    | [RNQ+]          |             |   |

|        |                                |        |                                                                                                                             |                                                    |
|--------|--------------------------------|--------|-----------------------------------------------------------------------------------------------------------------------------|----------------------------------------------------|
| UCD755 | <i>cerevisiae</i>              | wine   | wine, German? (C.S.O.-Centro Servizi Ortofrutticoli-Soc. Coop., Italy)                                                      | Viticulture and Enology Yeast Collection, UC Davis |
| UCD756 | <i>cerevisiae</i>              | wine   | commercial wine yeast                                                                                                       | Viticulture and Enology Yeast Collection, UC Davis |
| UCD757 | <i>cerevisiae</i>              | wine   | commercial wine yeast                                                                                                       | Viticulture and Enology Yeast Collection, UC Davis |
| UCD758 | <i>cerevisiae</i>              | wine   | Commercial wine yeast                                                                                                       | Viticulture and Enology Yeast Collection, UC Davis |
| UCD759 | <i>cerevisiae</i>              | wine   | commercial wine yeast                                                                                                       | Viticulture and Enology Yeast Collection, UC Davis |
| UCD76  | <i>cerevisiae</i>              | fruit  | Originally in Mrak's collection, 1948; Jean luc LeGras says it is the same as strain 49 which is from a citrus fermentation | Viticulture and Enology Yeast Collection, UC Davis |
| UCD760 | <i>cerevisiae</i>              | wine   | wine yeast                                                                                                                  | Viticulture and Enology Yeast Collection, UC Davis |
| UCD761 | <i>cerevisiae</i>              | wine   | wine yeast                                                                                                                  | Viticulture and Enology Yeast Collection, UC Davis |
| UCD762 |                                | 0 wine | Wine yeast, cold tolerant, Italy, 1984                                                                                      | Viticulture and Enology Yeast Collection, UC Davis |
| UCD763 | <i>cerevisiae</i>              | wine   | Commercial dry wine yeast                                                                                                   | Viticulture and Enology Yeast Collection, UC Davis |
| UCD764 | <i>cerevisiae</i>              | wine   | commercial dry wine yeast                                                                                                   | Viticulture and Enology Yeast Collection, UC Davis |
| UCD765 | <i>cerevisiae</i>              | wine   | wine yeast                                                                                                                  | Viticulture and Enology Yeast Collection, UC Davis |
| UCD766 | <i>cerevisiae</i>              | wine   | Commercial wine yeast from Germany                                                                                          | Viticulture and Enology Yeast Collection, UC Davis |
| UCD767 | <i>cerevisiae race bayanus</i> | wine   | wine yeast                                                                                                                  | Viticulture and Enology Yeast Collection, UC Davis |

|        |                                |      |                                     |                                                    |                 |              |   |  |
|--------|--------------------------------|------|-------------------------------------|----------------------------------------------------|-----------------|--------------|---|--|
| UCD768 | <i>cerevisiae</i>              | wine | wine yeast; "from a German company" | Viticulture and Enology Yeast Collection, UC Davis |                 |              |   |  |
| UCD769 | <i>cerevisiae</i>              | wine | commercial wine yeast               | Viticulture and Enology Yeast Collection, UC Davis | improved growth | YP-maltose   | - |  |
| UCD77  | <i>cerevisiae</i>              | wine | wine, champagne                     | Viticulture and Enology Yeast Collection, UC Davis | reduced growth  | Hydroxyurea  | - |  |
| UCD770 | <i>cerevisiae</i>              | wine | commercial wine yeast               | Viticulture and Enology Yeast Collection, UC Davis |                 |              |   |  |
| UCD771 | <i>cerevisiae</i>              | wine | wine yeast                          | Viticulture and Enology Yeast Collection, UC Davis |                 |              |   |  |
| UCD772 | <i>sp.</i>                     | wine | commercial wine yeast               | Viticulture and Enology Yeast Collection, UC Davis | improved growth | NaCl         | - |  |
|        |                                |      |                                     |                                                    | improved growth | tBOOH        | - |  |
| UCD773 | <i>cerevisiae</i>              | wine | wine yeast                          | Viticulture and Enology Yeast Collection, UC Davis | improved growth | Ethanol      | - |  |
|        |                                |      |                                     |                                                    | improved growth | Hydroxyurea  | - |  |
|        |                                |      |                                     |                                                    | improved growth | NaCl         | - |  |
| UCD774 | <i>cerevisiae</i>              | wine | wine yeast                          | Viticulture and Enology Yeast Collection, UC Davis |                 |              |   |  |
| UCD775 | <i>cerevisiae</i>              | wine | wine, Champagne                     | Viticulture and Enology Yeast Collection, UC Davis | reduced growth  | Ethanol      | - |  |
| UCD777 | <i>cerevisiae race bayanus</i> | wine | commercial wine yeast               | Viticulture and Enology Yeast Collection, UC Davis | reduced growth  | Ethanol      | - |  |
|        |                                |      |                                     |                                                    | improved growth | tBOOH        | - |  |
|        |                                |      |                                     |                                                    | improved growth | YP-galactose | - |  |
| UCD778 | <i>cerevisiae</i>              | wine | Commercial dry wine yeast           | Viticulture and Enology Yeast Collection, UC Davis | reduced growth  | Ethanol      | - |  |

|        |                                |         |                                                                |                                                    |                       |             |   |
|--------|--------------------------------|---------|----------------------------------------------------------------|----------------------------------------------------|-----------------------|-------------|---|
| UCD779 | <i>cerevisiae</i>              | wine    | Commercial dry wine yeast                                      | Viticulture and Enology Yeast Collection, UC Davis | [RNQ+] reduced growth | Ethanol     | - |
| UCD781 | <i>kudriavzevii</i>            | wine    | Commercial dry wine yeast                                      | Viticulture and Enology Yeast Collection, UC Davis |                       |             |   |
| UCD782 | <i>cerevisiae</i>              | wine    | wine yeast                                                     | Viticulture and Enology Yeast Collection, UC Davis | improved growth       | YP-glycerol | - |
| UCD784 | <i>cerevisiae</i>              | wine    | Alcohol tolerant wine yeast                                    | Viticulture and Enology Yeast Collection, UC Davis | improved growth       | 4-NQO       | - |
| UCD787 | <i>cerevisiae</i>              | wine    | wine                                                           | Viticulture and Enology Yeast Collection, UC Davis | improved growth       | pH 4        | - |
| UCD80  | <i>cerevisiae</i>              | wine    | wine                                                           | Viticulture and Enology Yeast Collection, UC Davis |                       |             |   |
| UCD804 | <i>sp</i>                      | wine    | wine commercial wine yeast, champagne                          | Viticulture and Enology Yeast Collection, UC Davis | reduced growth        | Ethanol     | - |
| UCD808 | <i>kudriavzevii</i>            | unknown | Contaminant in New York seltzer                                | Viticulture and Enology Yeast Collection, UC Davis |                       |             |   |
| UCD81  | <i>cerevisiae</i>              | unknown | From Steiner to Mrak in about 1940, another early "lab" yeast? | Viticulture and Enology Yeast Collection, UC Davis |                       |             |   |
| UCD810 | <i>cerevisiae</i>              | wine    | commercial wine yeast                                          | Viticulture and Enology Yeast Collection, UC Davis |                       |             |   |
| UCD811 | <i>cerevisiae race bayanus</i> | wine    | commercial wine yeast                                          | Viticulture and Enology Yeast Collection, UC Davis | reduced growth        | Ethanol     | - |
| UCD812 | <i>cerevisiae</i>              | wine    | commercial wine yeast                                          | Viticulture and Enology Yeast Collection, UC Davis | reduced growth        | Hydroxyurea | - |
| UCD813 | <i>cerevisiae</i>              | wine    | commercial wine yeast                                          | Viticulture and Enology Yeast Collection, UC Davis | reduced growth        | Ethanol     | - |
|        |                                |         |                                                                |                                                    | reduced growth        | Hydroxyurea | - |
|        |                                |         |                                                                |                                                    | reduced growth        | 4-NQO       | - |

|        |                                       |         |                                                                                         |                                                    |                  |                                    |                     |        |
|--------|---------------------------------------|---------|-----------------------------------------------------------------------------------------|----------------------------------------------------|------------------|------------------------------------|---------------------|--------|
|        |                                       |         |                                                                                         |                                                    |                  | reduced growth                     | Ethanol             | -      |
|        |                                       |         |                                                                                         |                                                    |                  | reduced growth                     | pH 9                | -      |
|        |                                       |         |                                                                                         |                                                    |                  | reduced growth                     | YP-galactose        | -      |
| UCD814 | <i>cerevisiae</i> race <i>bayanus</i> | wine    | commercial wine yeast                                                                   | Viticulture and Enology Yeast Collection, UC Davis |                  | improved growth                    | YP-glycerol         | -      |
| UCD815 | <i>cerevisiae</i> race <i>bayanus</i> | wine    | commercial wine yeast                                                                   | Viticulture and Enology Yeast Collection, UC Davis |                  |                                    |                     |        |
| UCD816 | <i>cerevisiae</i>                     | wine    | Red Star Yeast, Dan Star (Copenhagen) DGI-228                                           | Viticulture and Enology Yeast Collection, UC Davis |                  | reduced growth                     | YP-maltose          | -      |
| UCD818 | <i>cerevisiae</i>                     | wine    | commercial wine yeast                                                                   | Viticulture and Enology Yeast Collection, UC Davis |                  |                                    |                     |        |
| UCD819 | <i>cerevisiae</i>                     | wine    | commercial wine yeast<br>From Steiner to Mrak in about 1940, another early "lab" yeast? | Viticulture and Enology Yeast Collection, UC Davis | [RNQ+]           | reduced growth                     | tBOOH               | -      |
| UCD82  | <i>cerevisiae</i>                     | unknown |                                                                                         | Viticulture and Enology Yeast Collection, UC Davis |                  | improved growth                    | 4-NQO               | -      |
| UCD820 | <i>cerevisiae</i>                     | wine    | commercial wine yeast                                                                   | Viticulture and Enology Yeast Collection, UC Davis |                  | improved growth                    | pH 4                | -      |
| UCD821 | <i>cerevisiae</i>                     | wine    | commercial wine yeast                                                                   | Viticulture and Enology Yeast Collection, UC Davis |                  |                                    |                     |        |
| UCD822 | <i>cerevisiae</i>                     | wine    | commercial wine yeast                                                                   | Viticulture and Enology Yeast Collection, UC Davis |                  |                                    |                     |        |
| UCD823 | <i>cerevisiae</i>                     | wine    | commercial wine yeast                                                                   | Viticulture and Enology Yeast Collection, UC Davis |                  | improved growth                    | 4-NQO               | -      |
| UCD824 | <i>cerevisiae</i>                     | wine    | commercial wine yeast                                                                   | Viticulture and Enology Yeast Collection, UC Davis | [RNQ+]<br>[PSI+] | improved growth<br>improved growth | pH 4<br>Fluconazole | -<br>- |



|        |                                         |         |                                                                                                                                              |                                                    |                 |             |   |
|--------|-----------------------------------------|---------|----------------------------------------------------------------------------------------------------------------------------------------------|----------------------------------------------------|-----------------|-------------|---|
| UCD825 | <i>cerevisiae</i>                       | wine    | commercial wine yeast                                                                                                                        | Viticulture and Enology Yeast Collection, UC Davis | improved growth | 4-NQO       | - |
| UCD829 | <i>cerevisiae</i> race <i>bayanus</i>   | wine    | commercial wine yeast Steiner to Mrak, 1940's, originally may have come from Dekker                                                          | Viticulture and Enology Yeast Collection, UC Davis | reduced growth  | Ethanol     | - |
| UCD83  | <i>cerevisiae</i>                       | unknown |                                                                                                                                              | Viticulture and Enology Yeast Collection, UC Davis | reduced growth  | tBOOH       | - |
| UCD830 | <i>cerevisiae</i>                       | wine    | wine yeast Benda Keller K158 (75-9187), from Benda and Keller (Germany) K158 is probably the strain, the 75-9187 may refer to the year 1975. | Viticulture and Enology Yeast Collection, UC Davis |                 |             |   |
| UCD839 | <i>cerevisiae</i>                       | unknown |                                                                                                                                              | Viticulture and Enology Yeast Collection, UC Davis |                 |             |   |
| UCD840 | <i>cerevisiae</i>                       | wine    | wine strain                                                                                                                                  | Viticulture and Enology Yeast Collection, UC Davis |                 |             |   |
| UCD854 | <i>cerevisiae</i>                       | beer    | Ale, England, beer                                                                                                                           | Viticulture and Enology Yeast Collection, UC Davis | [RNQ+]          |             |   |
| UCD855 | <i>kudriavzevii</i>                     | wine    | wine, champagne, Europe                                                                                                                      | Viticulture and Enology Yeast Collection, UC Davis | reduced growth  | pH 4        | - |
| UCD856 | <i>cerevisiae</i>                       | baking  | bread yeast                                                                                                                                  | Viticulture and Enology Yeast Collection, UC Davis | reduced growth  | YP-glycerol | - |
| UCD857 | <i>cerevisiae</i>                       | beer    | Beechwood chip, beer                                                                                                                         | Viticulture and Enology Yeast Collection, UC Davis | improved growth | Hydroxyurea | - |
| UCD86  | <i>cerevisiae</i> , race <i>bayanus</i> | wine    | wine?                                                                                                                                        | Viticulture and Enology Yeast Collection, UC Davis | improved growth | NaCl        | - |
| UCD861 | <i>cerevisiae</i>                       | wine    | wine, Cellar experiment                                                                                                                      | Viticulture and Enology Yeast Collection, UC Davis | improved growth | Hydroxyurea | - |

|        |                     |         |                                                                                                                          |                                                    |                                   |                      |        |
|--------|---------------------|---------|--------------------------------------------------------------------------------------------------------------------------|----------------------------------------------------|-----------------------------------|----------------------|--------|
| UCD862 | <i>cerevisiae</i>   | wine    | wine, Cellar experiment                                                                                                  | Viticulture and Enology Yeast Collection, UC Davis | improved growth                   | 4-NQO                | -      |
| UCD866 | <i>cerevisiae</i>   | wine    | commercial wine yeast, dried                                                                                             | Viticulture and Enology Yeast Collection, UC Davis |                                   |                      |        |
| UCD867 | <i>cerevisiae</i>   | wine    | commercial yeast, wine?                                                                                                  | Viticulture and Enology Yeast Collection, UC Davis | reduced growth<br>improved growth | Fluconazole<br>4-NQO | -<br>- |
| UCD868 | <i>kudriavzevii</i> | wine    | commercial wine yeast                                                                                                    | Viticulture and Enology Yeast Collection, UC Davis |                                   |                      |        |
| UCD869 | <i>cerevisiae</i>   | wine    | Commercial wine yeast                                                                                                    | Viticulture and Enology Yeast Collection, UC Davis |                                   |                      |        |
| UCD87  | <i>cerevisiae</i>   | unknown | From Carlsberg Lab to Mrak 1948, Hansen?                                                                                 | Viticulture and Enology Yeast Collection, UC Davis |                                   |                      |        |
| UCD877 | <i>cerevisiae</i>   | wine    | wine, Czechoslovakia                                                                                                     | Viticulture and Enology Yeast Collection, UC Davis |                                   |                      |        |
| UCD878 | <i>cerevisiae</i>   | wine    | wine, Czechoslovakia                                                                                                     | Viticulture and Enology Yeast Collection, UC Davis | reduced growth                    | pH 4                 | -      |
| UCD879 | <i>cerevisiae</i>   | wine    | wine, Czechoslovakia                                                                                                     | Viticulture and Enology Yeast Collection, UC Davis |                                   |                      |        |
| UCD884 | <i>sp.</i>          | wine    | From Hennie van Vuuren, South Africa, 1991, K refers to killer factor. He did work on this for use in the wine industry. | Viticulture and Enology Yeast Collection, UC Davis | reduced growth                    | Ethanol              | -      |
| UCD885 | <i>sp.</i>          | wine    | From Hennie van Vuuren, South Africa, 1991, K refers to killer factor. He did work on this for use in the wine industry. | Viticulture and Enology Yeast Collection, UC Davis | [RNQ+]<br>[PSI+]                  |                      |        |

|        |                                |         |                                                                                                                          |                                                    |                 |            |   |
|--------|--------------------------------|---------|--------------------------------------------------------------------------------------------------------------------------|----------------------------------------------------|-----------------|------------|---|
| UCD886 | <i>sp.</i>                     | wine    | From Hennie van Vuuren, South Africa, 1991, K refers to killer factor. He did work on this for use in the wine industry. | Viticulture and Enology Yeast Collection, UC Davis | improved growth | 4-NQO      | - |
| UCD887 | <i>sp</i>                      | wine    | From Hennie van Vuuren, commercial German yeast from Geisenheim                                                          | Viticulture and Enology Yeast Collection, UC Davis | improved growth | YP-maltose | - |
| UCD888 | <i>sp</i>                      | wine    | wine                                                                                                                     | Viticulture and Enology Yeast Collection, UC Davis | improved growth | 4-NQO      | - |
| UCD889 | <i>cerevisiae</i>              | unknown | Paolo Guidici DPVA - Italy, from the collection in the Food Science group in Bologna. 1991                               | Viticulture and Enology Yeast Collection, UC Davis | improved growth | 4-NQO      | - |
| UCD89  | <i>cerevisiae race bayanus</i> | unknown | Scheffer and Mrak used in publicaton in early 1950's, something about Rec A in annotation                                | Viticulture and Enology Yeast Collection, UC Davis |                 |            |   |
| UCD890 | <i>cerevisiae</i>              | unknown | Paolo Guidici DPVA - Italy, from the collection in the Food Science group in Bologna. 1991                               | Viticulture and Enology Yeast Collection, UC Davis |                 |            |   |
| UCD891 | <i>cerevisiae</i>              | unknown | Paolo Guidici DPVA - Italy, from the collection in the Food Science group in Bologna. 1991                               | Viticulture and Enology Yeast Collection, UC Davis |                 |            |   |
| UCD892 | <i>cerevisiae</i>              | unknown | Paolo Guidici DPVA - Italy, from the collection in the Food Science group in Bologna. 1991                               | Viticulture and Enology Yeast Collection, UC Davis |                 |            |   |

|        |                   |         |                                                                                                                                      |                                                    |                 |             |   |
|--------|-------------------|---------|--------------------------------------------------------------------------------------------------------------------------------------|----------------------------------------------------|-----------------|-------------|---|
| UCD893 | <i>cerevisiae</i> | unknown | Paolo Guidici DPVA - Italy, from the collection in the Food Science group in Bologna. 1991                                           | Viticulture and Enology Yeast Collection, UC Davis | reduced growth  | Ethanol     | - |
| UCD894 | <i>cerevisiae</i> | unknown | Paolo Guidici DPVA - Italy, from the collection in the Food Science group in Bologna. 1991                                           | Viticulture and Enology Yeast Collection, UC Davis |                 |             |   |
| UCD897 | <i>cerevisiae</i> | unknown | Stored for Viticulture and Enology Collection (Mary Miranda), 1991. FST collection was being culled, V&E took wine and beer strains. | Viticulture and Enology Yeast Collection, UC Davis |                 |             |   |
| UCD902 | <i>cerevisiae</i> | unknown | Paolo Guidici DPVA - Italy, from the collection in the Food Science group in Bologna. High fusel oil strain. 1996                    | Viticulture and Enology Yeast Collection, UC Davis |                 |             |   |
| UCD903 | <i>cerevisiae</i> | unknown | Paolo Guidici DPVA - Italy, from the collection in the Food Science group in Bologna. High fusel oil strain. 1996                    | Viticulture and Enology Yeast Collection, UC Davis |                 |             |   |
| UCD904 | <i>cerevisiae</i> | wine    | commercial dry wine yeast                                                                                                            | Viticulture and Enology Yeast Collection, UC Davis | improved growth | Ethanol     | - |
| UCD905 | <i>cerevisiae</i> | wine    | commercial dry wine yeast                                                                                                            | Viticulture and Enology Yeast Collection, UC Davis | reduced growth  | tBOOH       | - |
|        |                   |         |                                                                                                                                      |                                                    | reduced growth  |             |   |
|        |                   |         |                                                                                                                                      |                                                    | improved growth | YP-glycerol | - |
|        |                   |         |                                                                                                                                      |                                                    | growth          | 4-NQO       | - |

|        |                   |      |                              |                                                    |                 |             |   |
|--------|-------------------|------|------------------------------|----------------------------------------------------|-----------------|-------------|---|
|        |                   |      |                              |                                                    | improved growth | Fluconazole | - |
|        |                   |      |                              |                                                    | improved growth | Hydroxyurea | - |
|        |                   |      |                              |                                                    | improved growth | NaCl        | - |
|        |                   |      |                              |                                                    | improved growth | pH 4        | - |
|        |                   |      |                              |                                                    | improved growth | pH 9        | - |
| UCD906 | <i>sp</i>         | wine | Commercial, dry wine culture | Viticulture and Enology Yeast Collection, UC Davis | reduced growth  | Ethanol     | - |
| UCD907 | <i>cerevisiae</i> | wine | Commercial dry wine yeast    | Viticulture and Enology Yeast Collection, UC Davis | reduced growth  | pH 9        | - |
| UCD908 | <i>cerevisiae</i> | wine | commercial wine yeast        | Viticulture and Enology Yeast Collection, UC Davis |                 |             |   |
| UCD909 | <i>cerevisiae</i> | wine | commercial wine yeast        | Viticulture and Enology Yeast Collection, UC Davis | reduced growth  | 4-NQO       | - |
|        |                   |      |                              |                                                    | reduced growth  | Hydroxyurea | - |
|        |                   |      |                              |                                                    | reduced growth  | YP-maltose  | - |
| UCD910 | <i>cerevisiae</i> | sake | Sake, rice wine              | Viticulture and Enology Yeast Collection, UC Davis | reduced growth  | Fluconazole | - |
|        |                   |      |                              |                                                    | reduced growth  | pH 9        | - |
|        |                   |      |                              |                                                    | reduced growth  | YP-glycerol | - |
|        |                   |      |                              |                                                    | reduced growth  | YP-maltose  | - |
| UCD911 | <i>sp.</i>        | sake | sake, rice wne               | Viticulture and Enology Yeast Collection, UC Davis | reduced growth  | pH 9        | - |

|        |            |      |                        |                                                    |        |                 |              |   |
|--------|------------|------|------------------------|----------------------------------------------------|--------|-----------------|--------------|---|
|        |            |      |                        |                                                    |        | reduced growth  | YP-maltose   | - |
| UCD912 | <i>sp.</i> | beer | Beer, lager            | Viticulture and Enology Yeast Collection, UC Davis |        |                 |              |   |
| UCD913 | <i>sp.</i> | beer | Ale, beer, California  | Viticulture and Enology Yeast Collection, UC Davis | [RNQ+] |                 |              |   |
| UCD914 | <i>sp.</i> | beer | Ale, beer, USA         | Viticulture and Enology Yeast Collection, UC Davis |        | improved growth | YP-galactose | - |
| UCD916 | <i>sp.</i> | beer | beer, Lager, USA       | Viticulture and Enology Yeast Collection, UC Davis |        | reduced growth  | Fluconazole  | - |
|        |            |      |                        |                                                    |        | reduced growth  | Hydroxyurea  | - |
|        |            |      |                        |                                                    |        | reduced growth  | NaCl         | - |
|        |            |      |                        |                                                    |        | reduced growth  | pH 9         | - |
|        |            |      |                        |                                                    |        | reduced growth  | YP-glycerol  | - |
|        |            |      |                        |                                                    |        | improved growth | 4-NQO        | - |
|        |            |      |                        |                                                    |        | improved growth | Ethanol      | - |
| UCD919 | <i>sp.</i> | sake | Sake, Japan, rice wine | Viticulture and Enology Yeast Collection, UC Davis |        | reduced growth  | 4-NQO        | - |
|        |            |      |                        |                                                    |        | reduced growth  | Ethanol      | - |
|        |            |      |                        |                                                    |        | reduced growth  | Fluconazole  | - |
|        |            |      |                        |                                                    |        | reduced growth  | Hydroxyurea  | - |
|        |            |      |                        |                                                    |        | reduced growth  | NaCl         | - |

|        |                                |      |                                   |                                                    |                 |              |   |
|--------|--------------------------------|------|-----------------------------------|----------------------------------------------------|-----------------|--------------|---|
|        |                                |      |                                   |                                                    | reduced growth  | pH 4         | - |
|        |                                |      |                                   |                                                    | reduced growth  | pH 9         | - |
|        |                                |      |                                   |                                                    | reduced growth  | tBOOH        | - |
|        |                                |      |                                   |                                                    | reduced growth  | YP-galactose | - |
|        |                                |      |                                   |                                                    | reduced growth  | YP-maltose   | - |
| UCD924 | <i>cerevisiae</i>              | wine | Commercial wine, Active dry yeast | Viticulture and Enology Yeast Collection, UC Davis |                 |              |   |
| UCD925 | <i>cerevisiae race bayanus</i> | wine | Commercial wine, Active Dry Yeast | Viticulture and Enology Yeast Collection, UC Davis | reduced growth  | 4-NQO        | - |
|        |                                |      |                                   |                                                    | reduced growth  | Fluconazole  | - |
|        |                                |      |                                   |                                                    | reduced growth  | NaCl         | - |
|        |                                |      |                                   |                                                    | reduced growth  | pH 9         | - |
| UCD926 | <i>cerevisiae</i>              | wine | Commercial wine, Active dry yeast | Viticulture and Enology Yeast Collection, UC Davis | reduced growth  | NaCl         | - |
|        |                                |      |                                   |                                                    | reduced growth  | YP-maltose   | - |
| UCD927 | <i>cerevisiae</i>              | wine | Commercial wine, Active dry yeast | Viticulture and Enology Yeast Collection, UC Davis | reduced growth  | 4-NQO        | - |
|        |                                |      |                                   |                                                    | reduced growth  | Hydroxyurea  | - |
|        |                                |      |                                   |                                                    | reduced growth  | YP-maltose   | - |
|        |                                |      |                                   |                                                    | improved growth | Ethanol      | - |

|        |                   |             |                                   |                                                    |                        |             |   |
|--------|-------------------|-------------|-----------------------------------|----------------------------------------------------|------------------------|-------------|---|
| UCD928 | <i>cerevisiae</i> | wine        | Commercial wine, Active dry yeast | Viticulture and Enology Yeast Collection, UC Davis | reduced growth         | 4-NQO       | - |
|        |                   |             |                                   |                                                    | reduced growth         | Ethanol     | - |
|        |                   |             |                                   |                                                    | reduced growth         | Hydroxyurea | - |
|        |                   |             |                                   |                                                    | reduced growth         | YP-maltose  | - |
| UCD929 | <i>cerevisiae</i> | wine        | Commercial wine, Active dry yeast | Viticulture and Enology Yeast Collection, UC Davis | reduced growth         | Hydroxyurea | - |
|        |                   |             |                                   |                                                    | reduced growth         | pH 4        | - |
| UCD930 | <i>sp</i>         | wine        | wine, commercial                  | Viticulture and Enology Yeast Collection, UC Davis |                        |             |   |
| UCD931 | <i>sp</i>         | wine        | wine, commercial                  | Viticulture and Enology Yeast Collection, UC Davis | reduced growth         | Ethanol     | - |
| UCD932 | <i>cerevisiae</i> | grapes/must | grapes, vineyard, Italy           | Viticulture and Enology Yeast Collection, UC Davis |                        |             |   |
| UCD933 | <i>cerevisiae</i> | grapes/must | grapes, vineyard, Italy           | Viticulture and Enology Yeast Collection, UC Davis |                        |             |   |
| UCD934 | <i>cerevisiae</i> | grapes/must | grapes, vineyard, Italy           | Viticulture and Enology Yeast Collection, UC Davis | reduced growth         | NaCl        | - |
| UCD935 | <i>cerevisiae</i> | grapes/must | grapes, vineyard, Italy           | Viticulture and Enology Yeast Collection, UC Davis |                        |             |   |
| UCD936 | <i>cerevisiae</i> | grapes/must | grapes, vineyard, Italy           | Viticulture and Enology Yeast Collection, UC Davis |                        |             |   |
| UCD937 | <i>cerevisiae</i> | grapes/must | grapes, vineyard, Italy           | Viticulture and Enology Yeast Collection, UC Davis |                        |             |   |
| UCD938 | <i>cerevisiae</i> | grapes/must | grapes, vineyard, Italy           | Viticulture and Enology Yeast Collection, UC Davis | improved growth        | 4-NQO       | - |
| UCD939 | <i>cerevisiae</i> | grapes/must | grapes, vineyard, Italy           | Viticulture and Enology Yeast Collection, UC Davis | [RNQ+] improved growth | 4-NQO       | - |
|        |                   |             |                                   |                                                    | [PSI+] improved growth |             |   |



|        |                   |             |                         |                                                    |                 |              |   |
|--------|-------------------|-------------|-------------------------|----------------------------------------------------|-----------------|--------------|---|
| UCD940 | <i>cerevisiae</i> | grapes/must | grapes, vineyard, Italy | Viticulture and Enology Yeast Collection, UC Davis | improved growth | 4-NQO        | - |
|        |                   |             |                         |                                                    | improved growth | pH 9         | - |
|        |                   |             |                         |                                                    | improved growth | YP-maltose   | - |
| UCD941 | <i>cerevisiae</i> | grapes/must | grapes, vineyard, Italy | Viticulture and Enology Yeast Collection, UC Davis | improved growth | 4-NQO        | - |
|        |                   |             |                         |                                                    | improved growth | YP-maltose   | - |
| UCD942 | <i>cerevisiae</i> | grapes/must | grapes, vineyard, Italy | Viticulture and Enology Yeast Collection, UC Davis | improved growth | YP-galactose | - |
| UCD943 | <i>cerevisiae</i> | grapes/must | grapes, vineyard, Italy | Viticulture and Enology Yeast Collection, UC Davis |                 |              |   |
| UCD944 | <i>cerevisiae</i> | grapes/must | grapes, vineyard, Italy | Viticulture and Enology Yeast Collection, UC Davis | reduced growth  | Hydroxyurea  | - |
| UCD945 | <i>cerevisiae</i> | grapes/must | grapes, vineyard, Italy | Viticulture and Enology Yeast Collection, UC Davis | reduced growth  | 4-NQO        | - |
|        |                   |             |                         |                                                    | reduced growth  | Ethanol      | - |
|        |                   |             |                         |                                                    | reduced growth  | Fluconazole  | - |
|        |                   |             |                         |                                                    | reduced growth  | Hydroxyurea  | - |
|        |                   |             |                         |                                                    | reduced growth  | YP-glycerol  | - |
| UCD946 | <i>cerevisiae</i> | grapes/must | grapes, vineyard, Italy | Viticulture and Enology Yeast Collection, UC Davis | improved growth | YP-galactose | - |
| UCD947 | <i>cerevisiae</i> | grapes/must | grapes, vineyard, Italy | Viticulture and Enology Yeast Collection, UC Davis | reduced growth  | Hydroxyurea  | - |
| UCD948 | <i>cerevisiae</i> | grapes/must | grapes, vineyard, Italy | Viticulture and Enology Yeast Collection, UC Davis | reduced growth  | Ethanol      | - |

|        |                   |             |                         |                                                    |                 |              |   |
|--------|-------------------|-------------|-------------------------|----------------------------------------------------|-----------------|--------------|---|
| UCD949 | <i>cerevisiae</i> | grapes/must | grapes, vineyard, Italy | Viticulture and Enology Yeast Collection, UC Davis | reduced growth  | Ethanol      | - |
| UCD950 | <i>cerevisiae</i> | grapes/must | grapes, vineyard, Italy | Viticulture and Enology Yeast Collection, UC Davis | reduced growth  | NaCl         | - |
| UCD951 | <i>cerevisiae</i> | grapes/must | grapes, vineyard, Italy | Viticulture and Enology Yeast Collection, UC Davis | reduced growth  | Ethanol      | - |
| UCD952 | <i>cerevisiae</i> | grapes/must | grapes, vineyard, Italy | Viticulture and Enology Yeast Collection, UC Davis | reduced growth  | 4-NQO        | - |
| UCD953 | <i>cerevisiae</i> | grapes/must | grapes, vineyard, Italy | Viticulture and Enology Yeast Collection, UC Davis | reduced growth  | Ethanol      | - |
|        |                   |             |                         |                                                    | reduced growth  | pH 9         | - |
| UCD954 | <i>cerevisiae</i> | grapes/must | grapes, vineyard, Italy | Viticulture and Enology Yeast Collection, UC Davis | improved growth | Ethanol      | - |
|        |                   |             |                         |                                                    | improved growth | NaCl         | - |
|        |                   |             |                         |                                                    | improved growth | YP-galactose | - |
|        |                   |             |                         |                                                    | improved growth | YP-maltose   | - |
| UCD955 | <i>cerevisiae</i> | grapes/must | grapes, vineyard, Italy | Viticulture and Enology Yeast Collection, UC Davis |                 |              |   |
| UCD956 | <i>cerevisiae</i> | grapes/must | grapes, vineyard, Italy | Viticulture and Enology Yeast Collection, UC Davis | reduced growth  | 4-NQO        | - |
|        |                   |             |                         |                                                    | reduced growth  | YP-maltose   | - |
| UCD957 | <i>cerevisiae</i> | grapes/must | grapes, vineyard, Italy | Viticulture and Enology Yeast Collection, UC Davis | reduced growth  | 4-NQO        | - |
|        |                   |             |                         |                                                    | reduced growth  | Fluconazole  | - |
|        |                   |             |                         |                                                    | reduced growth  | Hydroxyurea  | - |

|        |                   |             |                         |                                                    |                |             |   |
|--------|-------------------|-------------|-------------------------|----------------------------------------------------|----------------|-------------|---|
| UCD958 | <i>cerevisiae</i> | grapes/must | grapes, vineyard, Italy | Viticulture and Enology Yeast Collection, UC Davis | reduced growth | YP-maltose  | - |
|        |                   |             |                         |                                                    | reduced growth | 4-NQO       | - |
|        |                   |             |                         |                                                    | reduced growth | Ethanol     | - |
|        |                   |             |                         |                                                    | reduced growth | Fluconazole | - |
|        |                   |             |                         |                                                    | reduced growth | Hydroxyurea | - |
| UCD959 | <i>cerevisiae</i> | wine        | Commercial wine yeast   | Viticulture and Enology Yeast Collection, UC Davis | reduced growth | YP-glycerol | - |
|        |                   |             |                         |                                                    | reduced growth | Fluconazole | - |
|        |                   |             |                         |                                                    | reduced growth | Hydroxyurea | - |
| UCD960 | <i>cerevisiae</i> | wine        | Commercial wine yeast   | Viticulture and Enology Yeast Collection, UC Davis | reduced growth | 4-NQO       | - |
|        |                   |             |                         |                                                    | reduced growth | Fluconazole | - |
|        |                   |             |                         |                                                    | reduced growth | Hydroxyurea | - |
|        |                   |             |                         |                                                    | reduced growth | pH 9        | - |
|        |                   |             |                         |                                                    | reduced growth | Ethanol     | - |
| UCD961 | <i>cerevisiae</i> | wine        | Commercial wine yeast   | Viticulture and Enology Yeast Collection, UC Davis | reduced growth | Fluconazole | - |
|        |                   |             |                         |                                                    | reduced growth | Hydroxyurea | - |
|        |                   |             |                         |                                                    | reduced growth | pH 9        | - |
|        |                   |             |                         |                                                    | reduced growth |             |   |
|        |                   |             |                         |                                                    | reduced growth |             |   |

|        |                                |      |                                              |                                                    |                       |              |   |
|--------|--------------------------------|------|----------------------------------------------|----------------------------------------------------|-----------------------|--------------|---|
| UCD962 | <i>sp.</i>                     | wine | Commercial wine yeast                        | Viticulture and Enology Yeast Collection, UC Davis | reduced growth        | pH 9         | - |
|        |                                |      |                                              |                                                    | reduced growth        | YP-glycerol  | - |
| UCD963 | <i>cerevisiae</i>              | wine | Commercial wine yeast                        | Viticulture and Enology Yeast Collection, UC Davis | reduced growth        | Ethanol      | - |
|        |                                |      |                                              |                                                    | reduced growth        | Fluconazole  | - |
| UCD964 | <i>cerevisiae</i>              | wine | Commercial wine yeast                        | Viticulture and Enology Yeast Collection, UC Davis | reduced growth        | Ethanol      | - |
|        |                                |      |                                              |                                                    | reduced growth        | Fluconazole  | - |
| UCD965 | <i>sp.</i>                     | wine | Commercial wine yeast                        | Viticulture and Enology Yeast Collection, UC Davis |                       |              |   |
| UCD966 | <i>sp.</i>                     | wine | Commercial wine yeast; Danske Spritfabrikker | Viticulture and Enology Yeast Collection, UC Davis | [RNQ+] reduced growth | Fluconazole  | - |
|        |                                |      |                                              |                                                    | improved growth       | NaCl         | - |
|        |                                |      |                                              |                                                    | improved growth       | YP-galactose | - |
| UCD967 | <i>cerevisiae</i>              | wine | commercial wine yeast                        | Viticulture and Enology Yeast Collection, UC Davis |                       |              |   |
| UCD968 | <i>cerevisiae</i>              | wine | Commercial dry wine yeast                    | Viticulture and Enology Yeast Collection, UC Davis | reduced growth        | 4-NQO        | - |
| UCD969 | <i>cerevisiae race bayanus</i> | wine | commercial dry wine yeast                    | Viticulture and Enology Yeast Collection, UC Davis | reduced growth        | pH 4         | - |
| UCD970 | <i>cerevisiae</i>              | wine | Commerical dry wine yeast                    | Viticulture and Enology Yeast Collection, UC Davis |                       |              |   |
| UCD971 | <i>cerevisiae</i>              | wine | Commerical wine yeast                        | Viticulture and Enology Yeast Collection, UC Davis | reduced growth        | 4-NQO        | - |
|        |                                |      |                                              |                                                    | reduced growth        | Fluconazole  | - |

|        |                                       |      |                                    |                                                    |               |                 |                |   |
|--------|---------------------------------------|------|------------------------------------|----------------------------------------------------|---------------|-----------------|----------------|---|
| UCD972 | <i>sp.</i>                            | wine | Commercial wine, ADWY              | Viticulture and Enology Yeast Collection, UC Davis | [RNQ+]        | reduced growth  | 4-NQO          | - |
|        |                                       |      |                                    |                                                    |               | reduced growth  | Fluconazole    | - |
|        |                                       |      |                                    |                                                    |               | reduced growth  | YP-maltose     | - |
| UCD974 | <i>cerevisiae</i>                     | wine | Commercial wine yeast              | Viticulture and Enology Yeast Collection, UC Davis |               | reduced growth  | 4-NQO          | - |
|        |                                       |      |                                    |                                                    |               | reduced growth  | Fluconazole    | - |
|        |                                       |      |                                    |                                                    |               | improved growth | YP-maltose     | - |
| UCD975 | <i>sp.</i>                            | wine | Commercial wine yeast              | Viticulture and Enology Yeast Collection, UC Davis |               | reduced growth  | Ethanol        | - |
|        |                                       |      |                                    |                                                    |               | reduced growth  | Hydroxyurea    | - |
|        |                                       |      |                                    |                                                    |               | reduced growth  | pH 4           | - |
|        |                                       |      |                                    |                                                    |               | improved growth | YP-maltose     | - |
| UCD976 | <i>sp.</i>                            | wine | Commercial wine yeast              | Viticulture and Enology Yeast Collection, UC Davis |               | improved growth | YP-maltose     | - |
| UCD977 | <i>sp.</i>                            | wine | commercial dry wine yeast; Danstar | Viticulture and Enology Yeast Collection, UC Davis |               | improved growth | YP-maltose     | - |
| UCD978 | <i>sp.</i>                            | wine | commercial dry wine yeast; Danstar | Viticulture and Enology Yeast Collection, UC Davis | [RNQ+] [PSI+] | reduced growth  | tBOOH adhesive | - |
|        |                                       |      |                                    |                                                    |               | trait lost      | growth         | - |
| UCD979 | <i>cerevisiae</i>                     | wine | Commercial wine yeast              | Viticulture and Enology Yeast Collection, UC Davis | [RNQ+]        | improved growth | Ethanol        | - |
| UCD980 | <i>cerevisiae</i> race <i>bayanus</i> | wine | Commercial wine yeast              | Viticulture and Enology Yeast Collection, UC Davis |               | reduced growth  | YP-maltose     | - |

|                        |                   |             |                                                                                               |                                                    |          |                 |              |     |
|------------------------|-------------------|-------------|-----------------------------------------------------------------------------------------------|----------------------------------------------------|----------|-----------------|--------------|-----|
| UCD981 Urquell Pilsner | <i>cerevisiae</i> | beer        | Commercial Ale yeast, from British brewery, National Collection of Yeast Cultures strain 1108 | Viticulture and Enology Yeast Collection, UC Davis | [RNQ+]   | reduced growth  | 4-NQO        | -   |
| WE372                  | <i>cerevisiae</i> | beer        | brewing                                                                                       | Wyeast                                             |          | improved growth | YPD          | Yes |
|                        |                   | wine        | wine                                                                                          | Leonid Kruglyak                                    |          | reduced growth  | pH 9         | Yes |
| Y-10988                | <i>cerevisiae</i> | clinical    | patient                                                                                       | ARSC                                               |          |                 |              |     |
| Y-12649                | <i>cerevisiae</i> | wine        | Umbria must                                                                                   | ARSC                                               |          |                 |              |     |
| Y-12657                | <i>cerevisiae</i> | fruit       | olive                                                                                         | ARSC                                               |          |                 |              |     |
| Y-12659                | <i>cerevisiae</i> | clinical    | patient                                                                                       | ARSC                                               |          |                 |              |     |
| Y-139                  | <i>cerevisiae</i> | grapes/must | grape                                                                                         | ARSC                                               | [MOT3 +] |                 |              |     |
| Y-1537                 | <i>cerevisiae</i> | grapes/must | grapes                                                                                        | ARSC                                               | [MOT3 +] | improved growth | fluconazole  | -   |
| Y-162                  | <i>cerevisiae</i> | wine        | port wine                                                                                     | ARSC                                               | [MOT3 +] | reduced growth  | tBOOH        | -   |
|                        |                   |             |                                                                                               |                                                    |          | reduced growth  | YP-galactose | -   |
| Y-2034                 | <i>cerevisiae</i> | wine        | wine, California                                                                              | ARSC                                               |          | improved growth | YP-maltose   | -   |
| Y-2209                 | <i>cerevisiae</i> | fruit       | Lepidopterus leaves, California                                                               | ARSC                                               | [RNQ+]   |                 |              |     |
| Y-2411                 | <i>cerevisiae</i> | wine        | vineyard, Turkey                                                                              | ARSC                                               |          |                 |              |     |
| Y-266                  | <i>cerevisiae</i> | wine        | burgundy wine                                                                                 | ARSC                                               |          |                 |              |     |
| Y-269                  | <i>cerevisiae</i> | wine        | Tokay wine                                                                                    | ARSC                                               | [MOT3 +] |                 |              |     |
| Y-27788                | <i>cerevisiae</i> | clinical    | patient; US. Baltimore                                                                        | ARSC                                               | [RNQ+]   | improved growth | NaCl         | -   |

|         |                   |          |                       |                 |                        |                  |     |
|---------|-------------------|----------|-----------------------|-----------------|------------------------|------------------|-----|
| Y-27806 | <i>cerevisiae</i> | clinical | patient               | ARSC            | [RNQ+] improved growth | NaCl             | Yes |
| Y-35    | <i>cerevisiae</i> | fruit    | Ilex aquifolium       | ARSC            | [MOT3 improved growth] | calcofluor white | -   |
| Y-382   | <i>cerevisiae</i> | grain    | grain                 | ARSC            |                        |                  |     |
| Y-492   | <i>cerevisiae</i> | clinical | patient               | ARSC            | [RNQ+]                 |                  |     |
| Y-5511  | <i>cerevisiae</i> | fruit    | coconut               | ARSC            |                        |                  |     |
| Y-584   | <i>cerevisiae</i> | wine     | Moselle wine          | ARSC            |                        |                  |     |
| Y-7115  | <i>cerevisiae</i> | wine     | Chablis wine starter  | ARSC            |                        |                  |     |
| Y-7327  | <i>cerevisiae</i> | beer     | Tibetan beer starter  | ARSC            |                        |                  |     |
| Y-7568  | <i>cerevisiae</i> | fruit    | papaya                | ARSC            | reduced growth         | YP-maltose       | -   |
| Y-865   | <i>cerevisiae</i> | wine     | Bordeaux              | ARSC            |                        |                  |     |
| Y12     | <i>cerevisiae</i> | beer     | beer                  | Leonid Kruglyak |                        |                  |     |
| YB-210  | <i>cerevisiae</i> | fruit    | banana                | ARSC            |                        |                  |     |
| YB-3121 | <i>cerevisiae</i> | fruit    | mimosa                | ARSC            | reduced growth         | Ethanol          | -   |
| YB-399  | <i>cerevisiae</i> | fruit    | cherries              | ARSC            | [RNQ+] improved growth | 39C              | Yes |
| YB-4081 | <i>cerevisiae</i> | fruit    | guava                 | ARSC            |                        |                  |     |
| YB-4082 | <i>cerevisiae</i> | fruit    | papaya                | ARSC            |                        |                  |     |
| YB-432  | <i>cerevisiae</i> | fruit    | pineapple             | ARSC            | [RNQ+]                 |                  |     |
| YB-4449 | <i>cerevisiae</i> | fruit    | grape vine slime flux | ARSC            |                        |                  |     |
| YB-908  | <i>cerevisiae</i> | fruit    | wild cherry tree gum  | ARSC            |                        |                  |     |
| YJM326  | <i>cerevisiae</i> | clinical | clinical              | Leonid Kruglyak |                        |                  |     |
| YJM421  | <i>cerevisiae</i> | clinical | clinical              | Leonid Kruglyak | improved growth        | NaCl             | -   |
| YJM428  | <i>cerevisiae</i> | clinical | clinical              | Leonid Kruglyak | improved growth        | NaCl             | Yes |

|        |                   |          |          |                 |  |                 |            |     |
|--------|-------------------|----------|----------|-----------------|--|-----------------|------------|-----|
|        |                   |          |          |                 |  | improved growth |            |     |
|        |                   |          |          |                 |  | reduced growth  | 4-NQO      | Yes |
|        |                   |          |          |                 |  | improved growth | YP-maltose | Yes |
| YJM436 | <i>cerevisiae</i> | clinical | clinical | Leonid Kruglyak |  | improved growth | YPD        | -   |
| YJM653 | <i>cerevisiae</i> | clinical | clinical | Leonid Kruglyak |  | improved growth | NaCl       | Yes |

---



**Supplementary Table 2.** Polymorphisms at the *SUP35* locus of wild [*PSI*<sup>+</sup>] strains, from –338 to +1102. The PrD of Sup35 encompasses AA 1-114 (nt 1-342). \*UCD978 is heterozygous for *SUP35*.

|           | Nucleotide position relative to S288C <i>SUP35</i> start |     |     |     |     |     |     |     |     |     |
|-----------|----------------------------------------------------------|-----|-----|-----|-----|-----|-----|-----|-----|-----|
|           | -144                                                     | 197 | 325 | 484 | 506 | 550 | 555 | 616 | 653 | 672 |
| S288C     | -                                                        | C   | A   | G   | T   | A   | C   | C   | T   | C   |
| UCD587    |                                                          |     |     |     |     |     |     |     |     |     |
| UCD779    |                                                          |     |     | A   |     |     |     |     |     |     |
| UCD824    |                                                          |     |     | A   |     |     |     |     |     |     |
| UCD978*   |                                                          |     |     | A   |     |     |     |     |     |     |
| UCD939    |                                                          |     |     | A   |     | G   |     |     |     |     |
| 5672      | T                                                        |     |     | A   |     |     |     | A   |     |     |
| UCD978*   | T                                                        | T   | G   | A   | A   |     | G   |     | C   | G   |
| AA change | -                                                        | -   | N→S | G→D | D→E | K→R | P→A | -   | -   | H→D |

**Supplementary Table 3.** Doubling times of wild [*PSI*<sup>+</sup>] strains conditions used for their brief laboratory culture (Yeast potato dextrose, YM broth, FM broth, wort agar, Wallerstein nutrient agar).

|               | YM<br>medium | YPD | FM<br>medium | Yeast<br>potato<br>dextrose | WLN<br>medium | Wort<br>medium | MMM   |
|---------------|--------------|-----|--------------|-----------------------------|---------------|----------------|-------|
| UCD521        | 150          | 150 | 140          | 230                         | 190           | 280            | 260   |
| UCD521 cured  | 150          | 150 | 140          | 150                         | 150           | 200            | 300   |
| UCD587        | 75           | 80  | 110          | 340                         | 80            | 130            | 120   |
| UCD587 cured  | 75           | 80  | 110          | 310                         | 80            | 130            | 120   |
| UCD779        | 55           | 60  | 90           | 260                         | 65            | 90             | 120   |
| UCD779 cured  | 55           | 60  | 90           | 260                         | 65            | 75             | 130   |
| UCD824        | 65           | 70  | 900          | 1500                        | 70            | 115            | 105   |
| UCD824 cured  | 65           | 70  | 200          | 380                         | 70            | 85             | 130   |
| UCD939        | 60           | 65  | 255          | 475                         | 750           | 85             | 115   |
| UCD939 cured  | 60           | 65  | 130          | 400                         | 75            | 85             | 115   |
| UCD978        | 75           | 115 | 690          | >1000                       | 90            | 95             | 120   |
| UCD978 cured  | 75           | 85  | 590          | >1000                       | 90            | 95             | 120   |
| UCD2534       | 70           | 80  | 130          | 640                         | 75            | 170            | 125   |
| UCD2534 cured | 70           | 65  | 80           | 640                         | 75            | 170            | 120   |
| 5672          | 135          | 150 | 225          | 320                         | 200           | 445            | 255   |
| 5672 cured    | 85           | 130 | 225          | 315                         | 200           | 440            | >2000 |
